# Supplementary material for: The Exquisitely Preserved Dinosaur Skin of Psittacosaurus and the Scaly Skin of Ceratopsian Dinosaurs
Source: Research Square preprint supplement (doi:10.21203/rs.3.rs-1374507/v1), 2022-03-18
Supplement: Supplementary file 1 [file 2909f4535c8dcd311d85ccc0.xlsx]

## Sheet: Scale diameter
Head (mandible)		Head (Palate)		Neck (ant)		Neck (post)		Forelimb (Star of David)		Flank		Abdomen (post.)	Abdomen (ant.)	Hindlimb (Star of David)		Crus		Ankle		Tarsus	Ischial callosity	Cloaca	Tail (cv.10-12)		Tail (cv.14-15)	Tail (cv.16-20)		Dorsal tail	Coracoid	Pectoral feature scales	Inner elbow
L	W	L	W	L	W	L	W	central scale (D)	Triangular scale (L)	L	W	L	L	central scale (D)	triangular scale (L)	L	W	L	W	D	D	L	L	W	L	L	W	D	D	D	D
Column1	Column2	Column3	Column4	Column5	Column6	Column7	Column8	Column9	Column10	Column11	Column12	Column14	Column15	Column16	Column17	Column18	Column19	Column20	Column21	Column22	Column23	Column24	Column25	Column26	Column27	Column28	Column29	Column30	Column31	Column32	Column33
1.6	1.4	1.6	0.8	1.4	1	1.4	1.2	1.3	0.4	2	1.3	1.1	1.8	1.2	0.5	1.5	1	2.4	2.8	1.8	3.2	3	3.8	1.9	2.3	3	6.8	2.5	2	9.8	1.5
2	1.6	1.2	0.6	1.6	0.8	1.3	1	1	0.5	2.1	1.5	1.2	1.8	1.2	0.6	1.8	1	2	2.9	1.1	3.2	3.7	3.1	1.5	2.6	2	5.5	2	2.3	6.7	1.2
2.6	1.4	0.6	0.6	1.8	0.7	1.9	1.3	1.4	0.4	2.8	1.9	1.5	1.8	1.5	0.5	1.3	1	2.1	3.5	1.1	3.2	3.1	3.3	2	3.2	2.2	5	1.9	1.7	8.4	1.2
3.8	2.2			1.4	0.8	1.9	1.1	1.3	0.5	2.5	2.1	1.5	1.3	1.4		1.6	1	2.1	3.1	1	3.1	3.3	3.4	1.9	3	2.3	4.9	1.6	1.8	8.3	0.9
3.4	2.4			1.9	0.8	1.9	1	1.1	0.4	2.2	1.6	1.8	2.2	1.1		1.6	1	1.6	3.1	0.9	3.7	4	3.1	1.3	2.6	2.8	4.8	2.2	1.8	8.8	0.8
2.68	1.8			1.62	0.82	1.68	1.12	1.22	0.44	2.32	1.68	1.42	1.78	1.28	0.533333	1.56	1	2.04	3.08	1.18	3.28	3.42	3.34	1.72	2.9	2.3	5.4	2.04	1.92	8.4	1.12
																									2.76667	2.43333
								Bolded numbers are averages
								All measurements in mm		L = Length
										W = width
										D = diameter
										cv. = caudal vertebrae
										ant = anterior
										post = posterior

## Sheet: Cloacal morphology
Taxon	Genus/species	Specimen no.	Cloacal form	Cloacal integument	Notes	Ecology
Aves	Gallus gallus	none	Transverse	naked skin	Wet specimen, dissection 'kit'	Terrestrial
Chelonia	Gopheris polyphemus	none	Oval/puckered	naked skin	Freeze dried specimen
	Natator depressus	none	Transverse/puckered	naked or tiny scales	Freeze dried specimen
Crocodylia	Alligator mississippiensis	none	Longitudinal	rosette scale pattern	Freeze dried specimen	Semiaquatic
	Crocodylus porosus	X Cb 1	Longitudinal	rosette scale pattern	Wet specimen	Semiaquatic
	Crocodylus porosus	X Cb 4	Longitudinal	rosette scale pattern	Wet specimen	Semiaquatic
	Crocodylus johnsoni	none	Longitudinal	rosette scale pattern	Freeze dried specimen	Semiaquatic
Serpentes	Viperidae gen. et sp. indet.	X Bo 2	Transverse	single scale anteriorly, multiple scales posteriorly	Wet specimen	Terrestrial
	Pseudechis porphyriacus	none	Transverse	paired scales anteriorly, single scale posteriorly	Freeze dried specimen	Terrestrial
	Notechis scutatus	none	Transverse	single scale anteriorly, multiple scales posteriorly	Freeze dried specimen	Terrestrial
	Crotalis tigris	none	Transverse	Single scale anteriorly, paired scales posteriorly	Freeze dried specimen	Terrestrial
	Constrictor constrictor	none	Transverse	single scale anteriorly, multiple scales posteriorly	Freeze dried specimen	Terrestrial
	Acalyptophis peronii	none	Transverse	Multiple scales anteriorly and posteriorly	Freeze dried specimen	Marine
	Nerodia sipeodon	none	Transverse	Paired scales anteriorly, multiple scales posteriorly	Freeze dried specimen	Semiaquatic
	Bitis arietans	none	Transverse	single scale anteriorly, multiple scales posteriorly	Freeze dried specimen	Terrestrial
	Crotalis adamanteus	none	Transverse	Single scale anteriorly, paired scales posteriorly	freeze dried specimen	Terrestrial
	Hoplocephalus bitorquatus	X Bm 53	Transverse	Single scale anteriorly, paired scales posteriorly	Wet specimen	Terrestrial
	Pseudonaja textilis	X Bm 41	Transverse	paired scales anteriorly, paired scale posteriorly	Wet specimen	Terrestrial
	Notechis scutatus	X Bm 26	Transverse	paired scales anteriorly, paired scale posteriorly	Wet specimen	Terrestrial
	Naja naja	X Bm 25	Transverse	Single scale anteriorly, paired scales posteriorly	Wet specimen	Terrestrial
	Dendrelaphis punctulatus	X B1 6	Transverse	paired scales anteriorly, paired scale posteriorly	Wet specimen	Arboreal
Scincidae	Egernia major	none	Transverse	Multiple scales anteriorly and posteriorly	Freeze dried specimen	Terrestrial
	Trachydosaurus rugosus	none	Transverse	Multiple scales anteriorly and posteriorly	Freeze dried specimen	Terrestrial
	Hemisphaeriodon gerrardi	none	Transverse	Multiple scales anteriorly and posteriorly	Freeze dried specimen	Terrestrial
	Tiliqua nigrolutea	none	Transverse	Multiple scales anteriorly and posteriorly	Freeze dried specimen	Terrestrial
	Trachydosaurus rugosus	X Bg 43	Transverse	Multiple scales anteriorly and posteriorly	Wet specimen	Terrestrial
	Tiliqua scincoides	X Bg 23	Transverse	Multiple scales anteriorly and posteriorly	Wet specimen	Terrestrial
	Egernia cunninghami	X Bg 6	Transverse	Multiple scales anteriorly and posteriorly	Wet specimen	Terrestrial
	Egernia striolata	X Bg 10	Transverse	Multiple scales anteriorly and posteriorly	Wet specimen	Terrestrial
Agamidae	Moloch horridus	X Ba 17	Transverse	Multiple scales anteriorly and posteriorly	Wet specimen	Terrestrial
	Amphibolurus barbatus	X Ba 5	Transverse	Multiple scales anteriorly and posteriorly	Wet specimen	Terrestrial
	Amphibolurus viddiceps	X Ba 13	Transverse	Multiple scales anteriorly and posteriorly	Wet specimen	Terrestrial
	Amphibolurus inermis	X Ba 7	Transverse	Multiple scales anteriorly and posteriorly	Wet specimen	Terrestrial
Helodermatidae	Heloderma suspectum	none	Transverse	Multiple scales anteriorly and posteriorly	Freeze dried specimen	Terrestrial
	Heloderma horridum	none	Transverse	Multiple scales anteriorly and posteriorly	Freeze dried specimen	Terrestrial
Lacertidae	Lacerta viridis	none	Transverse	Multiple scales anteriorly and posteriorly	Freeze dried specimen	Terrestrial
Varanidae	Varanus gouldii	X Bh 4	Transverse	Multiple scales anteriorly and posteriorly	Wet specimen	Terrestrial
	Varanus bengalensis	X Bh 3	Transverse	Multiple scales anteriorly and posteriorly	Wet specimen	Terrestrial
	Varanus acanthurus	X Bh 1	Transverse	Multiple scales anteriorly and posteriorly	Wet specimen	Terrestrial

## Sheet: Horn dimensions
	Clade	Taxon	Nasal Horncore Length (mm)	Postorbital Horncore Length (mm)	Estimated nasal horn length based on Psittacosaurus jugal horn 'sheath'	Estimated postorbital horn length based on Psittacosaurus jugal horn 'sheath'	Total Sheath Length (mm)	Sheath Only Length (mm)	% increase in horn length	Specimen	Main Source	Notes	Source
			Longuest nasal/postorbital horn						Values close to those obtained for the horn ‘sheath’ of Protoceratops, estimated to be around 140% larger than the bony core in SMF R 4970
1	Dinosauria, Ceratopsidae	Anchiceratops ornatus	97	315	135.8	441	NA	NA	NA	CMN 8535	Brown & Henderson, 2015		Mallon, J.C., Holmes, R., Eberth, D.A., Ryan, M.J., and Anderson, J.S. (2011). Variation in the skull of Anchiceratops (Dinosauria, Ceratopsidae) from the Horseshoe Canyon Formation (Upper Cretaceous) of Alberta. Journal of Vertebrate Paleontology 31, 1047-1071.
2	Dinosauria, Ceratopsidae	Anchiceratops ornatus	82.5	620	115.5	868	NA	NA	NA	ROM 802	Brown & Henderson, 2015		Mallon, J.C., Holmes, R., Eberth, D.A., Ryan, M.J., and Anderson, J.S. (2011). Variation in the skull of Anchiceratops (Dinosauria, Ceratopsidae) from the Horseshoe Canyon Formation (Upper Cretaceous) of Alberta. Journal of Vertebrate Paleontology 31, 1047-1071.
3	Dinosauria, Ceratopsidae	Anchiceratops ornatus	161.5	600	226.1	840	NA	NA	NA	TMP 1983.001.0001	Brown & Henderson, 2015		Mallon, J.C., Holmes, R., Eberth, D.A., Ryan, M.J., and Anderson, J.S. (2011). Variation in the skull of Anchiceratops (Dinosauria, Ceratopsidae) from the Horseshoe Canyon Formation (Upper Cretaceous) of Alberta. Journal of Vertebrate Paleontology 31, 1047-1071.
4	Dinosauria, Ceratopsidae	Anchiceratops ornatus	128.5	672.5	179.9	941.5	NA	NA	NA	UW 2419	Brown & Henderson, 2015		Mallon, J.C., Holmes, R., Eberth, D.A., Ryan, M.J., and Anderson, J.S. (2011). Variation in the skull of Anchiceratops (Dinosauria, Ceratopsidae) from the Horseshoe Canyon Formation (Upper Cretaceous) of Alberta. Journal of Vertebrate Paleontology 31, 1047-1071.
5	Dinosauria, Ceratopsidae	Arrhinoceratops brachyops	103	414	144.2	579.6	NA	NA	NA	ROM 769	Brown & Henderson, 2015		Mallon, J.C., Holmes, R., Anderson, J.S., Farke, A.A., Evans, D.C., and Sues, H.--‐D. (2014). New information on the rare horned dinosaur Arrhinoceratops brachyops (Ornithischia: Ceratopsidae) from the Upper Cretaceous of Alberta, Canada. Canadian Journal of Earth Sciences 51, 618-634
6	Dinosauria, Ceratopsidae	Arrhinoceratops brachyops	108	457	151.2	639.8	NA	NA	NA	ROM 1439	Brown & Henderson, 2015		Mallon, J.C., Holmes, R., Anderson, J.S., Farke, A.A., Evans, D.C., and Sues, H.--‐D. (2014). New information on the rare horned dinosaur Arrhinoceratops brachyops (Ornithischia: Ceratopsidae) from the Upper Cretaceous of Alberta, Canada. Canadian Journal of Earth Sciences 51, 618-634
7	Dinosauria, Ceratopsidae	Agujaceratops mariscalensis	150	430	210	602	NA	NA	NA	TMM 43093-1	Brown & Henderson, 2015		Forster, C.A., Sereno, P.C., Evans, T.W., and Rowe, T. (1993). A complete skull of Chasmosaurus mariscalensis (Dinosauria: Ceratopsidae) from the Aguja Formation (late Campanian) of west Texas. Journal of Vertebrate Paleontology 13, 161-170.
8	Dinosauria, Ceratopsidae	Chasmosaurus belli	144	67	201.6	93.8	NA	NA	NA	AMNH 5402	Brown & Henderson, 2015		Godfrey, S.J., and Holmes, R. (1995). Cranial morphology and systematics of Chasmosaurus (Dinosauria: Ceratopsidae) from the Upper Cretaceous of western Canada. Journal of Vertebrate Paleontology 15, 726-742.
9	Dinosauria, Ceratopsidae	Chasmosaurus belli	150	216	210	302.4	NA	NA	NA	CMN 1254	Brown & Henderson, 2015		Godfrey, S.J., and Holmes, R. (1995). Cranial morphology and systematics of Chasmosaurus (Dinosauria: Ceratopsidae) from the Upper Cretaceous of western Canada. Journal of Vertebrate Paleontology 15, 726-742.
10	Dinosauria, Ceratopsidae	Chasmosaurus russelli	133	133	186.2	186.2	NA	NA	NA	CMN 2280	Brown & Henderson, 2015		Godfrey, S.J., and Holmes, R. (1995). Cranial morphology and systematics of Chasmosaurus (Dinosauria: Ceratopsidae) from the Upper Cretaceous of western Canada. Journal of Vertebrate Paleontology 15, 726-742.
11	Dinosauria, Ceratopsidae	Chasmosaurus russelli	123	173	172.2	242.2	NA	NA	NA	CMN 8800	Brown & Henderson, 2015		Godfrey, S.J., and Holmes, R. (1995). Cranial morphology and systematics of Chasmosaurus (Dinosauria: Ceratopsidae) from the Upper Cretaceous of western Canada. Journal of Vertebrate Paleontology 15, 726-742.
12	Dinosauria, Ceratopsidae	Chasmosaurus sp.	196	73	274.4	102.2	NA	NA	NA	CMN 8801	Brown & Henderson, 2015		Godfrey, S.J., and Holmes, R. (1995). Cranial morphology and systematics of Chasmosaurus (Dinosauria: Ceratopsidae) from the Upper Cretaceous of western Canada. Journal of Vertebrate Paleontology 15, 726-742.
13	Dinosauria, Ceratopsidae	Chasmosaurus belli	236	103	330.4	144.2	NA	NA	NA	ROM 839	Brown & Henderson, 2015		Godfrey, S.J., and Holmes, R. (1995). Cranial morphology and systematics of Chasmosaurus (Dinosauria: Ceratopsidae) from the Upper Cretaceous of western Canada. Journal of Vertebrate Paleontology 15, 726-742.
14	Dinosauria, Ceratopsidae	Chasmosaurus belli	202	64	282.8	89.6	NA	NA	NA	ROM 843	Brown & Henderson, 2015		Godfrey, S.J., and Holmes, R. (1995). Cranial morphology and systematics of Chasmosaurus (Dinosauria: Ceratopsidae) from the Upper Cretaceous of western Canada. Journal of Vertebrate Paleontology 15, 726-742.
15	Dinosauria, Ceratopsidae	Chasmosaurus cf. C. russelli	138	130	193.2	182	NA	NA	NA	TMP 1981.19.175	Brown & Henderson, 2015		Godfrey, S.J., and Holmes, R. (1995). Cranial morphology and systematics of Chasmosaurus (Dinosauria: Ceratopsidae) from the Upper Cretaceous of western Canada. Journal of Vertebrate Paleontology 15, 726-742.
16	Dinosauria, Ceratopsidae	Chasmosaurus sp.	182	108	254.8	151.2	NA	NA	NA	TMP 2014.004.0001	Brown & Henderson, 2015		Caleb M. Brown, pers. measurements
17	Dinosauria, Ceratopsidae	Chasmosaurus sp.	135	172	189	240.8	NA	NA	NA	UALVP 40	Brown & Henderson, 2015		Godfrey, S.J., and Holmes, R. (1995). Cranial morphology and systematics of Chasmosaurus (Dinosauria: Ceratopsidae) from the Upper Cretaceous of western Canada. Journal of Vertebrate Paleontology 15, 726-742.
18	Dinosauria, Ceratopsidae	Chasmosaurus belli	115	47.5	161	66.5	NA	NA	NA	YPM 2016	Brown & Henderson, 2015		Godfrey, S.J., and Holmes, R. (1995). Cranial morphology and systematics of Chasmosaurus (Dinosauria: Ceratopsidae) from the Upper Cretaceous of western Canada. Journal of Vertebrate Paleontology 15, 726-742.
19	Dinosauria, Ceratopsidae	Eotriceratops xerinsularis	148	717	207.2	1003.8	NA	NA	NA	TMP 2002.57.007	Brown & Henderson, 2015		Caleb M. Brown, pers. measurements
20	Dinosauria, Ceratopsidae	Mojoceratops perifania	130	370	182	518	NA	NA	NA	AMNH 5401	Brown & Henderson, 2015		Godfrey, S.J., and Holmes, R. (1995). Cranial morphology and systematics of Chasmosaurus (Dinosauria: Ceratopsidae) from the Upper Cretaceous of western Canada. Journal of Vertebrate Paleontology 15, 726-742.
21	Dinosauria, Ceratopsidae	Mojoceratops perifania	118	306	165.2	428.4	NA	NA	NA	TMP 1979.011.0147	Brown & Henderson, 2015		Godfrey, S.J., and Holmes, R. (1995). Cranial morphology and systematics of Chasmosaurus (Dinosauria: Ceratopsidae) from the Upper Cretaceous of western Canada. Journal of Vertebrate Paleontology 15, 726-742.
22	Dinosauria, Ceratopsidae	Regaliceratops peterhewsi	257	147	359.8	205.8	NA	NA	NA	TMP 2005.055.0001	Brown & Henderson, 2015		Caleb M. Brown, pers. measurements
23	Dinosauria, Ceratopsidae	Titanoceratops ouranos	160	910	224	1274	NA	NA	NA	OMNH 10165	Brown & Henderson, 2015		Lehman, T.M. (1998). A gigantic skull and skeleton of the horned dinosaur Pentaceratops sternbergi from New Mexico. Journal of Paleontology 72, 894-906.
24	Dinosauria, Ceratopsidae	Triceratops prorsus	83	500	116.2	700	NA	NA	NA	MOR 1110	Brown & Henderson, 2015		Scannella, J.B., Fowler, D.W., Goodwin, M.B., and Horner, J.R. (2014). Evolutionary trends in Triceratops from the Hell Creek Formation, Montana. Proceedings of the National Academy of Sciences 111, 10245-10250.
25	Dinosauria, Ceratopsidae	Triceratops horridus	58	490	81.2	686	NA	NA	NA	MOR 1120	Brown & Henderson, 2015		Scannella, J.B., Fowler, D.W., Goodwin, M.B., and Horner, J.R. (2014). Evolutionary trends in Triceratops from the Hell Creek Formation, Montana. Proceedings of the National Academy of Sciences 111, 10245-10250.
26	Dinosauria, Ceratopsidae	Triceratops sp.	265	605	371	847	NA	NA	NA	MOR 1604	Brown & Henderson, 2015		Scannella, J.B., Fowler, D.W., Goodwin, M.B., and Horner, J.R. (2014). Evolutionary trends in Triceratops from the Hell Creek Formation, Montana. Proceedings of the National Academy of Sciences 111, 10245-10250.
27	Dinosauria, Ceratopsidae	Triceratops sp.	220	500	308	700	NA	NA	NA	MOR 2551	Brown & Henderson, 2015		Scannella, J.B., Fowler, D.W., Goodwin, M.B., and Horner, J.R. (2014). Evolutionary trends in Triceratops from the Hell Creek Formation, Montana. Proceedings of the National Academy of Sciences 111, 10245-10250.
28	Dinosauria, Ceratopsidae	Triceratops prorsus	210	510	294	714	NA	NA	NA	MOR 2574	Brown & Henderson, 2015		Scannella, J.B., Fowler, D.W., Goodwin, M.B., and Horner, J.R. (2014). Evolutionary trends in Triceratops from the Hell Creek Formation, Montana. Proceedings of the National Academy of Sciences 111, 10245-10250.
29	Dinosauria, Ceratopsidae	Triceratops prorsus	290	550	406	770	NA	NA	NA	MOR 2923	Brown & Henderson, 2015		Scannella, J.B., Fowler, D.W., Goodwin, M.B., and Horner, J.R. (2014). Evolutionary trends in Triceratops from the Hell Creek Formation, Montana. Proceedings of the National Academy of Sciences 111, 10245-10250.
30	Dinosauria, Ceratopsidae	Triceratops sp.	270	600	378	840	NA	NA	NA	MOR 2952	Brown & Henderson, 2015		Scannella, J.B., Fowler, D.W., Goodwin, M.B., and Horner, J.R. (2014). Evolutionary trends in Triceratops from the Hell Creek Formation, Montana. Proceedings of the National Academy of Sciences 111, 10245-10250.
31	Dinosauria, Ceratopsidae	Triceratops sp.	100	500	140	700	NA	NA	NA	MOR 2982	Brown & Henderson, 2015		Scannella, J.B., Fowler, D.W., Goodwin, M.B., and Horner, J.R. (2014). Evolutionary trends in Triceratops from the Hell Creek Formation, Montana. Proceedings of the National Academy of Sciences 111, 10245-10250.
32	Dinosauria, Ceratopsidae	Triceratops sp.	65	470	91	658	NA	NA	NA	MOR 3010	Brown & Henderson, 2015		Scannella, J.B., Fowler, D.W., Goodwin, M.B., and Horner, J.R. (2014). Evolutionary trends in Triceratops from the Hell Creek Formation, Montana. Proceedings of the National Academy of Sciences 111, 10245-10250.
33	Dinosauria, Ceratopsidae	Triceratops sp.	160	583	224	816.2	NA	NA	NA	MOR 3045	Brown & Henderson, 2015		Scannella, J.B., Fowler, D.W., Goodwin, M.B., and Horner, J.R. (2014). Evolutionary trends in Triceratops from the Hell Creek Formation, Montana. Proceedings of the National Academy of Sciences 111, 10245-10250.
34	Dinosauria, Ceratopsidae	Triceratops horridus	139	500	194.6	700	NA	NA	NA	MOR 3081	Brown & Henderson, 2015		Scannella, J.B., Fowler, D.W., Goodwin, M.B., and Horner, J.R. (2014). Evolutionary trends in Triceratops from the Hell Creek Formation, Montana. Proceedings of the National Academy of Sciences 111, 10245-10250.
35	Dinosauria, Ceratopsidae	Triceratops sp.	110	780	154	1092	NA	NA	NA	USNM 4928	Brown & Henderson, 2015		Hatcher, J.B., Marsh, O.C., and Lull, R.S. (1907). The Ceratopsia. Monographs of the United States Geological Survey XLIX, 1-300.
36	Dinosauria, Ceratopsidae	Torosaurus latus	106	380	148.4	532	NA	NA	NA	ANSP 15192	Brown & Henderson, 2015		Farke, A.A. (2007). Cranial osteology and phylogenetic relationships of the chasmosaurine ceratopsid Torosaurus latus. In Horns and Beaks: Ceratopsian and Ornithopod Dinosaurs, K. Carpenter, ed. (Bloomington: Indiana University Press), pp. 235-257.
37	Dinosauria, Ceratopsidae	Torosaurus sp.	128	853	179.2	1194.2	NA	NA	NA	MOR 981	Brown & Henderson, 2015		Farke, A.A. (2007). Cranial osteology and phylogenetic relationships of the chasmosaurine ceratopsid Torosaurus latus. In Horns and Beaks: Ceratopsian and Ornithopod Dinosaurs, K. Carpenter, ed. (Bloomington: Indiana University Press), pp. 235-257.
38	Dinosauria, Ceratopsidae	Torosaurus sp.	145	434	203	607.6	NA	NA	NA	MOR 1122	Brown & Henderson, 2015		Farke, A.A. (2007). Cranial osteology and phylogenetic relationships of the chasmosaurine ceratopsid Torosaurus latus. In Horns and Beaks: Ceratopsian and Ornithopod Dinosaurs, K. Carpenter, ed. (Bloomington: Indiana University Press), pp. 235-257.
39	Dinosauria, Ceratopsidae	Torosaurus sp.	98	357	137.2	499.8	NA	NA	NA	TMP 1985.10.13	Brown & Henderson, 2015		Caleb M. Brown, pers. measurements
40	Dinosauria, Ceratopsidae	Vagaceratops irvinensis	115	42	161	58.8	NA	NA	NA	CMN 41357	Brown & Henderson, 2015		Jordan C . Mallon, pers. measurements
41	Dinosauria, Ceratopsidae	Vagaceratops irvinensis	100	43	140	60.2	NA	NA	NA	TMP 1987.45.1	Brown & Henderson, 2015		Caleb M. Brown, pers. measurements
42	Dinosauria, Ceratopsidae	Centrosaurus apertus	358	88.5	501.2	123.9	NA	NA	NA	AMNH 5239	Brown & Henderson, 2015		Caleb M. Brown, pers. measurements
43	Dinosauria, Ceratopsidae	Centrosaurus apertus	458	53.5	641.2	74.9	NA	NA	NA	AMNH 5351	Brown & Henderson, 2015		Caleb M. Brown, pers. measurements
44	Dinosauria, Ceratopsidae	Centrosaurus apertus	314	50.5	439.6	70.7	NA	NA	NA	CMN 347 - Laval	Brown & Henderson, 2015		Caleb M. Brown, pers. measurements
45	Dinosauria, Ceratopsidae	Centrosaurus apertus	204	154	285.6	215.6	NA	NA	NA	CMN 348	Brown & Henderson, 2015		Caleb M. Brown, pers. measurements
46	Dinosauria, Ceratopsidae	Centrosaurus apertus	320	51	448	71.4	NA	NA	NA	CMN 1173	Brown & Henderson, 2015		Caleb M. Brown, pers. measurements
47	Dinosauria, Ceratopsidae	Centrosaurus apertus	218	111	305.2	155.4	NA	NA	NA	CMN 11837	Brown & Henderson, 2015		Caleb M. Brown, pers. measurements
48	Dinosauria, Ceratopsidae	Centrosaurus apertus	200	78	280	109.2	NA	NA	NA	CMN 8795	Brown & Henderson, 2015		Caleb M. Brown, pers. measurements
49	Dinosauria, Ceratopsidae	Centrosaurus apertus	237	58	331.8	81.2	NA	NA	NA	CMN 8798	Brown & Henderson, 2015		Caleb M. Brown, pers. measurements
50	Dinosauria, Ceratopsidae	Centrosaurus apertus	293	96.5	410.2	135.1	NA	NA	NA	ROM 767	Brown & Henderson, 2015		Caleb M. Brown, pers. measurements
51	Dinosauria, Ceratopsidae	Centrosaurus apertus	206	34	288.4	47.6	NA	NA	NA	TMP 1992.82.1	Brown & Henderson, 2015		Caleb M. Brown, pers. measurements
52	Dinosauria, Ceratopsidae	Centrosaurus apertus	221	75.5	309.4	105.7	NA	NA	NA	TMP 1997.85.1	Brown & Henderson, 2015		Caleb M. Brown, pers. measurements
53	Dinosauria, Ceratopsidae	Centrosaurus apertus	208	145	291.2	203	NA	NA	NA	UALVP 11735	Brown & Henderson, 2015		Caleb M. Brown, pers. measurements
54	Dinosauria, Ceratopsidae	Centrosaurus apertus	318	69.5	445.2	97.3	NA	NA	NA	YPM 2015	Brown & Henderson, 2015		Caleb M. Brown, pers. measurements
55	Dinosauria, Ceratopsidae	Monoclonius recurvicornus	175	166	245	232.4	NA	NA	NA	AMNH 3999	Brown & Henderson, 2015		Hatcher, J.B., Marsh, O.C., and Lull, R.S. (1907). The Ceratopsia. Monographs of the United States Geological Survey XLIX, 1-300.
56	Dinosauria, Ceratopsidae	Monoclonius lowei	198	45.5	277.2	63.7	NA	NA	NA	CMN 8790	Brown & Henderson, 2015		Caleb M. Brown, pers. measurements
57	Dinosauria, Ceratopsidae	Pachyrhinosaurus canadensis	235	95	329	133	NA	NA	NA	CMN 9485	Brown & Henderson, 2015		Langston, W., Jr. (1975). The ceratopsian dinosaurs and associated lower vertebrates from the St. Mary River formation (Maestrichtian) at Scabby Butte, southern Alberta. Canadian Journal of Earth Sciences 12, 1576-1608.
58	Dinosauria, Ceratopsidae	Pachyrhinosaurus canadensis	278	100	389.2	140	NA	NA	NA	Drumheller	Brown & Henderson, 2015		Currie, P.J., Langston, J.W., and Tanke, D.H. (2008). A new species of Pachyrhinosaurus (Dinosauria, Ceratopsidae) from the Upper Cretaceous of Alberta, Canada. In A new horned dinosaur from and Upper Cretaceous bone bed in Alberta, P.J. Currie, J.W. Langston and D.H. Tanke, eds. (Ottawa: NRC Research Press), pp. 1‐108.
59	Dinosauria, Ceratopsidae	Pachyrhinosaurus lakustai	165	65	231	91	NA	NA	NA	TMP 1986.55.258	Brown & Henderson, 2015		Currie, P.J., Langston, J.W., and Tanke, D.H. (2008). A new species of Pachyrhinosaurus (Dinosauria, Ceratopsidae) from the Upper Cretaceous of Alberta, Canada. In A new horned dinosaur from and Upper Cretaceous bone bed in Alberta, P.J. Currie, J.W. Langston and D.H. Tanke, eds. (Ottawa: NRC Research Press), pp. 1‐108.
60	Dinosauria, Ceratopsidae	Pachyrhinosaurus lakustai	175	80	245	112	NA	NA	NA	TMP 1987.55.156	Brown & Henderson, 2015		Currie, P.J., Langston, J.W., and Tanke, D.H. (2008). A new species of Pachyrhinosaurus (Dinosauria, Ceratopsidae) from the Upper Cretaceous of Alberta, Canada. In A new horned dinosaur from and Upper Cretaceous bone bed in Alberta, P.J. Currie, J.W. Langston and D.H. Tanke, eds. (Ottawa: NRC Research Press), pp. 1‐108.
61	Dinosauria, Ceratopsidae	Pachyrhinosaurus lakustai	150	70	210	98	NA	NA	NA	TMP 1989.55.188	Brown & Henderson, 2015		Currie, P.J., Langston, J.W., and Tanke, D.H. (2008). A new species of Pachyrhinosaurus (Dinosauria, Ceratopsidae) from the Upper Cretaceous of Alberta, Canada. In A new horned dinosaur from and Upper Cretaceous bone bed in Alberta, P.J. Currie, J.W. Langston and D.H. Tanke, eds. (Ottawa: NRC Research Press), pp. 1‐108.
62	Dinosauria, Ceratopsidae	Pachyrhinosaurus lakustai	210	75	294	105	NA	NA	NA	TMP 1989.55.1234	Brown & Henderson, 2015		Currie, P.J., Langston, J.W., and Tanke, D.H. (2008). A new species of Pachyrhinosaurus (Dinosauria, Ceratopsidae) from the Upper Cretaceous of Alberta, Canada. In A new horned dinosaur from and Upper Cretaceous bone bed in Alberta, P.J. Currie, J.W. Langston and D.H. Tanke, eds. (Ottawa: NRC Research Press), pp. 1‐108.
63	Dinosauria, Ceratopsidae	Pachyrhinosaurus perotorum	321	72	449.4	100.8	NA	NA	NA	DMNH 22558	Brown & Henderson, 2015		Fiorillo, A.R., and Tykoski, R.S. (2012). A new species of the centrosaurine ceratopsid Pachyrhinosaurus from the North Slope (Prince Creek Formation: Maastrichtian) of Alaska. Acta Palaeontologica Polonica 57, 561-573.
64	Dinosauria, Ceratopsidae	DPP Pachyrhinosaur	164	79	229.6	110.6	NA	NA	NA	TMP 2002.76.1	Brown & Henderson, 2015		Caleb M. Brown, pers. measurements
65	Dinosauria, Ceratopsidae	Rubeosaurus ovatus	390	150	546	210	NA	NA	NA	MOR 492	Brown & Henderson, 2015		McDonald, A.T., and Horner, J.R. (2010). New material of Styracosaurus ovatus from the Two Medicine Formation of Montana. In New perspectives on horned dinosaurs: the Royal Tyrrell Museum Ceratopsian Symposium. (Indiana University Press Bloomington, IN), pp. 156‐168.
66	Dinosauria, Ceratopsidae	Spinops sternbergorum	188	77	263.2	107.8	NA	NA	NA	NHM R 8648	Brown & Henderson, 2015		Caleb M. Brown, pers. measurements
67	Dinosauria, Ceratopsidae	Styracosaurus albertensis	534	62.5	747.6	87.5	NA	NA	NA	CMN 344	Brown & Henderson, 2015		Caleb M. Brown, pers. measurements
68	Dinosauria, Ceratopsidae	Styracosaurus albertensis	167	53.5	233.8	74.9	NA	NA	NA	TMP 2009.90.01	Brown & Henderson, 2015		Caleb M. Brown, pers. measurements
69	Dinosauria, Ceratopsidae	Styracosaurus albertensis	234	43	327.6	60.2	NA	NA	NA	TMP 2005.12.58	Brown & Henderson, 2015		Caleb M. Brown, pers. measurements
70	Mammalia, Antilocapridae	Antilocapra americana	NA	111	NA	NA	284.7	173.7	256.486	YPM 1513	Brown, 2017	male - left	Borkovic B. 2013. Investigating sexual dimorphism in Ceratopsid Horncores. M.Sc. University of Calgary.
71	Mammalia, Antilocapridae	Antilocapra americana	NA	139.3	NA	NA	308.3	169	221.321	NMNH 53512	Brown, 2017	male - left	Borkovic B. 2013. Investigating sexual dimorphism in Ceratopsid Horncores. M.Sc. University of Calgary.
72	Mammalia, Antilocapridae	Antilocapra americana	NA	148.3	NA	NA	360.7	212.3	243.223	NMNH 266158	Brown, 2017	male - left	Borkovic B. 2013. Investigating sexual dimorphism in Ceratopsid Horncores. M.Sc. University of Calgary.
73	Mammalia, Bovidae	Bison bison	NA	224	NA	NA	365	141	162.946	98954	Brown, 2017	female - sides averaged - ventral length	Borkovic B. 2013. Investigating sexual dimorphism in Ceratopsid Horncores. M.Sc. University of Calgary.
74	Mammalia, Bovidae	Bison bison	NA	180	NA	NA	407	227	226.111	88.26.1	Brown, 2017	female - sides averaged - ventral length	Borkovic B. 2013. Investigating sexual dimorphism in Ceratopsid Horncores. M.Sc. University of Calgary.
75	Mammalia, Bovidae	Bison bison	NA	169	NA	NA	355	187	210.059	93.19.1	Brown, 2017	female - sides averaged - ventral length	Borkovic B. 2013. Investigating sexual dimorphism in Ceratopsid Horncores. M.Sc. University of Calgary.
76	Mammalia, Bovidae	Bison bison	NA	159	NA	NA	374	216	235.22	35707	Brown, 2017	female - sides averaged - ventral length	Borkovic B. 2013. Investigating sexual dimorphism in Ceratopsid Horncores. M.Sc. University of Calgary.
77	Mammalia, Bovidae	Bison bison	NA	150	NA	NA	392	242	261.333	3401	Brown, 2017	female - sides averaged - ventral length	Borkovic B. 2013. Investigating sexual dimorphism in Ceratopsid Horncores. M.Sc. University of Calgary.
78	Mammalia, Bovidae	Bison bison	NA	167	NA	NA	356	189	213.174	80247	Brown, 2017	female - sides averaged - ventral length	Borkovic B. 2013. Investigating sexual dimorphism in Ceratopsid Horncores. M.Sc. University of Calgary.
79	Mammalia, Bovidae	Bison bison	NA	197	NA	NA	370	173	187.817	51416	Brown, 2017	female - sides averaged - ventral length	Borkovic B. 2013. Investigating sexual dimorphism in Ceratopsid Horncores. M.Sc. University of Calgary.
80	Mammalia, Bovidae	Bison bison	NA	254	NA	NA	368	114	144.882	73615	Brown, 2017	male - sides averaged - ventral length	Borkovic B. 2013. Investigating sexual dimorphism in Ceratopsid Horncores. M.Sc. University of Calgary.
81	Mammalia, Bovidae	Bison bison	NA	288	NA	NA	444	156	154.167	86950	Brown, 2017	male - sides averaged - ventral length	Borkovic B. 2013. Investigating sexual dimorphism in Ceratopsid Horncores. M.Sc. University of Calgary.
82	Mammalia, Bovidae	Bison bison	NA	275	NA	NA	477	202	173.455	45416	Brown, 2017	male - sides averaged - ventral length	Borkovic B. 2013. Investigating sexual dimorphism in Ceratopsid Horncores. M.Sc. University of Calgary.
83	Mammalia, Bovidae	Bison bison	NA	266	NA	NA	426	160	160.15	20126	Brown, 2017	male - sides averaged - ventral length	Borkovic B. 2013. Investigating sexual dimorphism in Ceratopsid Horncores. M.Sc. University of Calgary.
84	Mammalia, Bovidae	Bison bison	NA	276	NA	NA	530	254	192.029	89.10.2	Brown, 2017	male - sides averaged - ventral length	Borkovic B. 2013. Investigating sexual dimorphism in Ceratopsid Horncores. M.Sc. University of Calgary.
85	Mammalia, Bovidae	Bison bison	NA	248	NA	NA	439	191	177.016	89.10.3	Brown, 2017	male - sides averaged - ventral length	Borkovic B. 2013. Investigating sexual dimorphism in Ceratopsid Horncores. M.Sc. University of Calgary.
86	Mammalia, Bovidae	Bison bison	NA	261	NA	NA	448	187	171.648	89.10.4	Brown, 2017	male - sides averaged - ventral length	Borkovic B. 2013. Investigating sexual dimorphism in Ceratopsid Horncores. M.Sc. University of Calgary.
87	Mammalia, Bovidae	Bison bison	NA	238	NA	NA	407	170	171.008	89.10.5	Brown, 2017	male - sides averaged - ventral length	Borkovic B. 2013. Investigating sexual dimorphism in Ceratopsid Horncores. M.Sc. University of Calgary.
88	Mammalia, Bovidae	Bison bison	NA	266	NA	NA	450	185	169.173	90.2.2	Brown, 2017	male - sides averaged - ventral length	Borkovic B. 2013. Investigating sexual dimorphism in Ceratopsid Horncores. M.Sc. University of Calgary.
89	Mammalia, Bovidae	Bison bison	NA	253	NA	NA	514	261	203.162	75121	Brown, 2017	male - sides averaged - ventral length	Borkovic B. 2013. Investigating sexual dimorphism in Ceratopsid Horncores. M.Sc. University of Calgary.
90	Mammalia, Bovidae	Bison bison	NA	182	NA	NA	324	142	178.022	3405	Brown, 2017	male - sides averaged - ventral length	Borkovic B. 2013. Investigating sexual dimorphism in Ceratopsid Horncores. M.Sc. University of Calgary.
91	Mammalia, Bovidae	Bos taurus	NA	173	NA	NA	297	124	171.676	NA	Brown, 2017	Digitized using Plot Digitzer V2.6.3	Grigson C. 1975. The craniology and relationships of four species of Bos II. Basic craniology: Bos taurus L. Proportions and angles. Journal of Archaeological Science 2(2):109–128 DOI 10.1016/0305-4403(75)90030-8.
92	Mammalia, Bovidae	Bos taurus	NA	191	NA	NA	319	128	167.016	NA	Brown, 2017	Digitized using Plot Digitzer V2.6.3	Grigson C. 1975. The craniology and relationships of four species of Bos II. Basic craniology: Bos taurus L. Proportions and angles. Journal of Archaeological Science 2(2):109–128 DOI 10.1016/0305-4403(75)90030-8.
93	Mammalia, Bovidae	Bos taurus	NA	257	NA	NA	420	163	163.424	NA	Brown, 2017	Digitized using Plot Digitzer V2.6.3	Grigson C. 1975. The craniology and relationships of four species of Bos II. Basic craniology: Bos taurus L. Proportions and angles. Journal of Archaeological Science 2(2):109–128 DOI 10.1016/0305-4403(75)90030-8.
94	Mammalia, Bovidae	Bos taurus	NA	266	NA	NA	429	163	161.278	NA	Brown, 2017	Digitized using Plot Digitzer V2.6.3	Grigson C. 1975. The craniology and relationships of four species of Bos II. Basic craniology: Bos taurus L. Proportions and angles. Journal of Archaeological Science 2(2):109–128 DOI 10.1016/0305-4403(75)90030-8.
95	Mammalia, Bovidae	Bos taurus	NA	271	NA	NA	417	146	153.875	NA	Brown, 2017	Digitized using Plot Digitzer V2.6.3	Grigson C. 1975. The craniology and relationships of four species of Bos II. Basic craniology: Bos taurus L. Proportions and angles. Journal of Archaeological Science 2(2):109–128 DOI 10.1016/0305-4403(75)90030-8.
96	Mammalia, Bovidae	Bos taurus	NA	293	NA	NA	471	179	160.751	NA	Brown, 2017	Digitized using Plot Digitzer V2.6.3	Grigson C. 1975. The craniology and relationships of four species of Bos II. Basic craniology: Bos taurus L. Proportions and angles. Journal of Archaeological Science 2(2):109–128 DOI 10.1016/0305-4403(75)90030-8.
97	Mammalia, Bovidae	Bos taurus	NA	356	NA	NA	498	143	139.888	NA	Brown, 2017	Digitized using Plot Digitzer V2.6.3	Grigson C. 1975. The craniology and relationships of four species of Bos II. Basic craniology: Bos taurus L. Proportions and angles. Journal of Archaeological Science 2(2):109–128 DOI 10.1016/0305-4403(75)90030-8.
98	Mammalia, Bovidae	Bos taurus	NA	646	NA	NA	960	314	148.607	NA	Brown, 2017	Digitized using Plot Digitzer V2.6.3	Grigson C. 1975. The craniology and relationships of four species of Bos II. Basic craniology: Bos taurus L. Proportions and angles. Journal of Archaeological Science 2(2):109–128 DOI 10.1016/0305-4403(75)90030-8.
99	Mammalia, Bovidae	Bos taurus	NA	261	NA	NA	343	82	131.418	NA	Brown, 2017	Digitized using Plot Digitzer V2.6.3	Grigson C. 1975. The craniology and relationships of four species of Bos II. Basic craniology: Bos taurus L. Proportions and angles. Journal of Archaeological Science 2(2):109–128 DOI 10.1016/0305-4403(75)90030-8.
100	Mammalia, Bovidae	Bos taurus	NA	267	NA	NA	384	117	143.82	NA	Brown, 2017	Digitized using Plot Digitzer V2.6.3	Grigson C. 1975. The craniology and relationships of four species of Bos II. Basic craniology: Bos taurus L. Proportions and angles. Journal of Archaeological Science 2(2):109–128 DOI 10.1016/0305-4403(75)90030-8.
101	Mammalia, Bovidae	Bos taurus	NA	274	NA	NA	374	100	136.496	NA	Brown, 2017	Digitized using Plot Digitzer V2.6.3	Grigson C. 1975. The craniology and relationships of four species of Bos II. Basic craniology: Bos taurus L. Proportions and angles. Journal of Archaeological Science 2(2):109–128 DOI 10.1016/0305-4403(75)90030-8.
102	Mammalia, Bovidae	Bos taurus	NA	275	NA	NA	392	118	142.545	NA	Brown, 2017	Digitized using Plot Digitzer V2.6.3	Grigson C. 1975. The craniology and relationships of four species of Bos II. Basic craniology: Bos taurus L. Proportions and angles. Journal of Archaeological Science 2(2):109–128 DOI 10.1016/0305-4403(75)90030-8.
103	Mammalia, Bovidae	Bos taurus	NA	278	NA	NA	388	111	139.568	NA	Brown, 2017	Digitized using Plot Digitzer V2.6.3	Grigson C. 1975. The craniology and relationships of four species of Bos II. Basic craniology: Bos taurus L. Proportions and angles. Journal of Archaeological Science 2(2):109–128 DOI 10.1016/0305-4403(75)90030-8.
104	Mammalia, Bovidae	Bos taurus	NA	283	NA	NA	379	96	133.922	NA	Brown, 2017	Digitized using Plot Digitzer V2.6.3	Grigson C. 1975. The craniology and relationships of four species of Bos II. Basic craniology: Bos taurus L. Proportions and angles. Journal of Archaeological Science 2(2):109–128 DOI 10.1016/0305-4403(75)90030-8.
105	Mammalia, Bovidae	Bos taurus	NA	339	NA	NA	403	64	118.879	NA	Brown, 2017	Digitized using Plot Digitzer V2.6.3	Grigson C. 1975. The craniology and relationships of four species of Bos II. Basic craniology: Bos taurus L. Proportions and angles. Journal of Archaeological Science 2(2):109–128 DOI 10.1016/0305-4403(75)90030-8.
106	Mammalia, Bovidae	Bos taurus	NA	366	NA	NA	464	98	126.776	NA	Brown, 2017	Digitized using Plot Digitzer V2.6.3	Grigson C. 1975. The craniology and relationships of four species of Bos II. Basic craniology: Bos taurus L. Proportions and angles. Journal of Archaeological Science 2(2):109–128 DOI 10.1016/0305-4403(75)90030-8.
107	Mammalia, Bovidae	Bos taurus	NA	427	NA	NA	519	92	121.546	NA	Brown, 2017	Digitized using Plot Digitzer V2.6.3	Grigson C. 1975. The craniology and relationships of four species of Bos II. Basic craniology: Bos taurus L. Proportions and angles. Journal of Archaeological Science 2(2):109–128 DOI 10.1016/0305-4403(75)90030-8.
108	Mammalia, Bovidae	Bos taurus	NA	445	NA	NA	556	111	124.944	NA	Brown, 2017	Digitized using Plot Digitzer V2.6.3	Grigson C. 1975. The craniology and relationships of four species of Bos II. Basic craniology: Bos taurus L. Proportions and angles. Journal of Archaeological Science 2(2):109–128 DOI 10.1016/0305-4403(75)90030-8.
109	Mammalia, Bovidae	Capra ibex ibex	NA	570	NA	NA	930	360	163.158	NA	Brown, 2017	Averages, see ref.	Bubenik AB. 1990. Epigenetic, morphological, physiological and behavioral aspects of evolution of horns, pronghorns, and antlers. In: Bubenik GA, Bubenik AB, eds. Horns, Pronghorns, and Antlers: Evolution, Morphology, Physiology, and Social Significance. New York: Springer-Verlag, 3–113.
110	Mammalia, Bovidae	Capra ibex siberica	NA	377	NA	NA	1204	827	319.363	NA	Brown, 2017	Averages, see ref.	Bubenik AB. 1990. Epigenetic, morphological, physiological and behavioral aspects of evolution of horns, pronghorns, and antlers. In: Bubenik GA, Bubenik AB, eds. Horns, Pronghorns, and Antlers: Evolution, Morphology, Physiology, and Social Significance. New York: Springer-Verlag, 3–113.
111	Mammalia, Bovidae	Oreamnos harringtoni	NA	72.6	NA	NA	164.4	91.8	226.446	NA	Brown, 2017	Averages, see ref.	Mead JI, Lawler MC. 1995. Skull, mandible, and metapodials of the extinct Harrington’s mountain goat (Oreamnos harringtoni). Journal of Vertebrate Paleontology 14(4):562–576 DOI 10.1080/02724634.1995.10011578.
112	Mammalia, Bovidae	Oreamnos americanus	NA	93.6	NA	NA	221.6	128	236.752	NA	Brown, 2017	Averages, see ref.	Mead JI, Lawler MC. 1995. Skull, mandible, and metapodials of the extinct Harrington’s mountain goat (Oreamnos harringtoni). Journal of Vertebrate Paleontology 14(4):562–576 DOI 10.1080/02724634.1995.10011578.
113	Mammalia, Bovidae	Oreamnos americanus	NA	66.8	NA	NA	197.3	130.5	295.359	AMNH 35286	Brown, 2017	female - sides averaged - Posterior length	Borkovic B. 2013. Investigating sexual dimorphism in Ceratopsid Horncores. M.Sc. University of Calgary.
114	Mammalia, Bovidae	Oreamnos americanus	NA	74	NA	NA	173.7	99.7	234.73	AMNH 122670	Brown, 2017	female - sides averaged - Posterior length	Borkovic B. 2013. Investigating sexual dimorphism in Ceratopsid Horncores. M.Sc. University of Calgary.
115	Mammalia, Bovidae	Oreamnos americanus	NA	68.5	NA	NA	186.7	118.2	272.555	AMNH 130223	Brown, 2017	female - sides averaged - Posterior length	Borkovic B. 2013. Investigating sexual dimorphism in Ceratopsid Horncores. M.Sc. University of Calgary.
116	Mammalia, Bovidae	Oreamnos americanus	NA	68.7	NA	NA	193.2	124.5	281.223	NMC 1900	Brown, 2017	female - sides averaged - Posterior length	Borkovic B. 2013. Investigating sexual dimorphism in Ceratopsid Horncores. M.Sc. University of Calgary.
117	Mammalia, Bovidae	Oreamnos americanus	NA	75.7	NA	NA	175	99.3	231.176	Z92.24.1	Brown, 2017	female - sides averaged - Posterior length	Borkovic B. 2013. Investigating sexual dimorphism in Ceratopsid Horncores. M.Sc. University of Calgary.
118	Mammalia, Bovidae	Oreamnos americanus	NA	67.8	NA	NA	179.5	111.7	264.749	UAMZ 5665	Brown, 2017	female - sides averaged - Posterior length	Borkovic B. 2013. Investigating sexual dimorphism in Ceratopsid Horncores. M.Sc. University of Calgary.
119	Mammalia, Bovidae	Oreamnos americanus	NA	82.5	NA	NA	196.3	113.8	237.939	UAMZ 5668	Brown, 2017	female - sides averaged - Posterior length	Borkovic B. 2013. Investigating sexual dimorphism in Ceratopsid Horncores. M.Sc. University of Calgary.
120	Mammalia, Bovidae	Oreamnos americanus	NA	82.7	NA	NA	210.8	128.2	254.897	UAMZ 5669	Brown, 2017	female - sides averaged - Posterior length	Borkovic B. 2013. Investigating sexual dimorphism in Ceratopsid Horncores. M.Sc. University of Calgary.
121	Mammalia, Bovidae	Oreamnos americanus	NA	75.2	NA	NA	191.3	116.2	254.388	UAMZ 5671	Brown, 2017	female - sides averaged - Posterior length	Borkovic B. 2013. Investigating sexual dimorphism in Ceratopsid Horncores. M.Sc. University of Calgary.
122	Mammalia, Bovidae	Oreamnos americanus	NA	73	NA	NA	177.7	104.7	243.425	YPM 14604	Brown, 2017	female - sides averaged - Posterior length	Borkovic B. 2013. Investigating sexual dimorphism in Ceratopsid Horncores. M.Sc. University of Calgary.
123	Mammalia, Bovidae	Oreamnos americanus	NA	93	NA	NA	219.3	126.3	235.806	AMNH 35334	Brown, 2017	male - sides averaged - Posterior length	Borkovic B. 2013. Investigating sexual dimorphism in Ceratopsid Horncores. M.Sc. University of Calgary.
124	Mammalia, Bovidae	Oreamnos americanus	NA	92.2	NA	NA	231.5	139.3	251.085	AMNH 70573	Brown, 2017	male - sides averaged - Posterior length	Borkovic B. 2013. Investigating sexual dimorphism in Ceratopsid Horncores. M.Sc. University of Calgary.
125	Mammalia, Bovidae	Oreamnos americanus	NA	86.5	NA	NA	166.3	79.8	192.254	AMNH 122671	Brown, 2017	male - sides averaged - Posterior length	Borkovic B. 2013. Investigating sexual dimorphism in Ceratopsid Horncores. M.Sc. University of Calgary.
126	Mammalia, Bovidae	Oreamnos americanus	NA	82.7	NA	NA	174.2	91.5	210.641	AMNH 175583	Brown, 2017	male - sides averaged - Posterior length	Borkovic B. 2013. Investigating sexual dimorphism in Ceratopsid Horncores. M.Sc. University of Calgary.
127	Mammalia, Bovidae	Oreamnos americanus	NA	90	NA	NA	194.7	104.7	216.333	ROM 231191	Brown, 2017	male - sides averaged - Posterior length	Borkovic B. 2013. Investigating sexual dimorphism in Ceratopsid Horncores. M.Sc. University of Calgary.
128	Mammalia, Bovidae	Oreamnos americanus	NA	84.5	NA	NA	194.2	109.7	229.822	NMC 75079	Brown, 2017	male - sides averaged - Posterior length	Borkovic B. 2013. Investigating sexual dimorphism in Ceratopsid Horncores. M.Sc. University of Calgary.
129	Mammalia, Bovidae	Oreamnos americanus	NA	60.7	NA	NA	209.7	149	345.47	YPM 14605	Brown, 2017	NA - sides averaged - Posterior length	Borkovic B. 2013. Investigating sexual dimorphism in Ceratopsid Horncores. M.Sc. University of Calgary.
130	Mammalia, Bovidae	Ovis nivicola	NA	228	NA	NA	740	512	324.561	NA	Brown, 2017	Averages, see ref.	Bubenik AB. 1990. Epigenetic, morphological, physiological and behavioral aspects of evolution of horns, pronghorns, and antlers. In: Bubenik GA, Bubenik AB, eds. Horns, Pronghorns, and Antlers: Evolution, Morphology, Physiology, and Social Significance. New York: Springer-Verlag, 3–113.
131	Mammalia, Bovidae	Ovis dalli	NA	275	NA	NA	1110	835	403.636	NA	Brown, 2017	Averages, see ref.	Bubenik AB. 1990. Epigenetic, morphological, physiological and behavioral aspects of evolution of horns, pronghorns, and antlers. In: Bubenik GA, Bubenik AB, eds. Horns, Pronghorns, and Antlers: Evolution, Morphology, Physiology, and Social Significance. New York: Springer-Verlag, 3–113.
132	Mammalia, Bovidae	Ovis ammon	NA	404	NA	NA	1078	674	266.832	NA	Brown, 2017	Averages, see ref.	Bubenik AB. 1990. Epigenetic, morphological, physiological and behavioral aspects of evolution of horns, pronghorns, and antlers. In: Bubenik GA, Bubenik AB, eds. Horns, Pronghorns, and Antlers: Evolution, Morphology, Physiology, and Social Significance. New York: Springer-Verlag, 3–113.
133	Mammalia, Bovidae	Ovis canadensis nelsoni	NA	422	NA	NA	1096	674	259.716	NA	Brown, 2017	Averages, see ref.	Bubenik AB. 1990. Epigenetic, morphological, physiological and behavioral aspects of evolution of horns, pronghorns, and antlers. In: Bubenik GA, Bubenik AB, eds. Horns, Pronghorns, and Antlers: Evolution, Morphology, Physiology, and Social Significance. New York: Springer-Verlag, 3–113.
134	Mammalia, Bovidae	Ovis canadensis canadensis	NA	387.5	NA	NA	1230	842.5	317.419	NA	Brown, 2017	Averages, see ref.	Bubenik AB. 1990. Epigenetic, morphological, physiological and behavioral aspects of evolution of horns, pronghorns, and antlers. In: Bubenik GA, Bubenik AB, eds. Horns, Pronghorns, and Antlers: Evolution, Morphology, Physiology, and Social Significance. New York: Springer-Verlag, 3–113.
135	Reptilia, Phrynosomatidae	Phrynosoma solare	NA	6.35	NA	NA	6.84	0.49	107.717	LACM 123351	Brown, 2017	P1 - right	Measured from DigiMorph
136	Reptilia, Phrynosomatidae	Phrynosoma solare	NA	6.23	NA	NA	7.13	0.9	114.446	LACM 123351	Brown, 2017	P2 - left	Measured from DigiMorph
137	Reptilia, Phrynosomatidae	Phrynosoma solare	NA	3.32	NA	NA	3.78	0.46	113.855	LACM 123351	Brown, 2017	S3 - left	Measured from DigiMorph
138	Reptilia, Phrynosomatidae	Phrynosoma solare	NA	3.51	NA	NA	3.75	0.24	106.838	LACM 123351	Brown, 2017	S3 - right	Measured from DigiMorph
139	Reptilia, Phrynosomatidae	Phrynosoma cornutum	NA	9.56	NA	NA	10.23	0.67	107.008	TNHC 1930	Brown, 2017	P2 - right	Measured from DigiMorph
140	Reptilia, Phrynosomatidae	Phrynosoma cornutum	NA	2.72	NA	NA	3.4	0.68	125	TNHC 1930	Brown, 2017	S3 - left	Measured from DigiMorph
141	Reptilia, Phrynosomatidae	Phrynosoma cornutum	NA	2.77	NA	NA	3.33	0.56	120.217	TNHC 1930	Brown, 2017	S3 - right	Measured from DigiMorph
142	Reptilia, Phrynosomatidae	Phrynosoma platyrhinos	NA	3.69	NA	NA	4.1	0.41	111.111	TNHC 18496	Brown, 2017	S2 - right	Measured from DigiMorph
143	Reptilia, Phrynosomatidae	Phrynosoma platyrhinos	NA	3.84	NA	NA	4.35	0.51	113.281	TNHC 18496	Brown, 2017	S2 - left	Measured from DigiMorph
144	Reptilia, Phrynosomatidae	Phrynosoma platyrhinos	NA	1.64	NA	NA	2.02	0.38	123.171	TNHC 18496	Brown, 2017	S3 - left	Measured from DigiMorph
145	Reptilia, Phrynosomatidae	Phrynosoma platyrhinos	NA	1.58	NA	NA	1.76	0.18	111.392	TNHC 18496	Brown, 2017	S3 - right	Measured from DigiMorph
146	Reptilia, Phrynosomatidae	Phrynosoma taurus	NA	3.28	NA	NA	3.45	0.17	105.183	Museo de Zoologa, Facultad de Cineciad, U. N. A. M.)	Brown, 2017	F0, right	Measured from DigiMorph
147	Reptilia, Phrynosomatidae	Phrynosoma taurus	NA	3.17	NA	NA	3.43	0.26	108.202	Museo de Zoologa, Facultad de Cineciad, U. N. A. M.)	Brown, 2017	F0, left	Measured from DigiMorph
148	Reptilia, Phrynosomatidae	Phrynosoma modestum	NA	3.18	NA	NA	3.54	0.36	111.321	TNHC 48520	Brown, 2017	S1 - right	Measured from DigiMorph
149	Reptilia, Phrynosomatidae	Phrynosoma modestum	NA	3.49	NA	NA	3.69	0.2	105.731	TNHC 48520	Brown, 2017	P2 - left	Measured from DigiMorph
150	Reptilia, Phrynosomatidae	Phrynosoma macallii	NA	3.79	NA	NA	4.88	1.09	128.76	TNHC 062316	Brown, 2017	S2 - right	Measured from DigiMorph
151	Reptilia, Phrynosomatidae	Phrynosoma macallii	NA	3.45	NA	NA	4.27	0.82	123.768	TNHC 062316	Brown, 2017	S2 - left	Measured from DigiMorph
152	Reptilia, Phrynosomatidae	Phrynosoma braconnieri	NA	2.1	NA	NA	2.56	0.46	121.905	WLH 1117	Brown, 2017	P2 - right	Measured from DigiMorph
153	Reptilia, Phrynosomatidae	Phrynosoma braconnieri	NA	3.12	NA	NA	3.44	0.32	110.256	WLH 1117	Brown, 2017	P2 - left	Measured from DigiMorph
154	Reptilia, Phrynosomatidae	Phrynosoma asio	NA	4.98	NA	NA	5.6	0.62	112.45	WLH 1093	Brown, 2017	F0 - left	Measured from DigiMorph
155	Reptilia, Phrynosomatidae	Phrynosoma asio	NA	4.74	NA	NA	5.09	0.35	107.384	WLH 1093	Brown, 2017	F0 - right	Measured from DigiMorph
156	Reptilia, Phrynosomatidae	Phrynosoma asio	NA	6.39	NA	NA	7.37	0.98	115.336	WLH 1093	Brown, 2017	P2 - right	Measured from DigiMorph
157	Reptilia, Phrynosomatidae	Phrynosoma asio	NA	6.48	NA	NA	7.44	0.96	114.815	WLH 1093	Brown, 2017	P2 - left	Measured from DigiMorph
158	Reptilia, Phrynosomatidae	Phyrnosoma asio	NA	4.26	NA	NA	5.25	0.98	123.239	TMP 1990.007.0354	Brown, 2017	S2 - left	Measured by Caleb M. Brown using ocular micrometer
159	Reptilia, Phrynosomatidae	Phyrnosoma asio	NA	4.51	NA	NA	5	0.49	110.865	TMP 1990.007.0354	Brown, 2017	F0 - left	Measured by Caleb M. Brown using ocular micrometer
160	Reptilia, Phrynosomatidae	Phyrnosoma asio	NA	4.51	NA	NA	5.25	0.74	116.408	TMP 1990.007.0354	Brown, 2017	S1 - left	Measured by Caleb M. Brown using ocular micrometer
161	Reptilia, Phrynosomatidae	Phyrnosoma asio	NA	4.84	NA	NA	5.74	0.9	118.595	TMP 1990.007.0354	Brown, 2017	S1 - right	Measured by Caleb M. Brown using ocular micrometer
162	Reptilia, Phrynosomatidae	Phyrnosoma asio	NA	4.67	NA	NA	5.41	0.74	115.846	TMP 1990.007.0354	Brown, 2017	S2 - right	Measured by Caleb M. Brown using ocular micrometer
163	Reptilia, Phrynosomatidae	Phyrnosoma asio	NA	4.43	NA	NA	5	0.57	112.867	TMP 1990.007.0354	Brown, 2017	F0 - right	Measured by Caleb M. Brown using ocular micrometer
164	Reptilia, Phrynosomatidae	Phyrnosoma asio	NA	4.59	NA	NA	5.41	0.82	117.865	TMP 1990.007.0354	Brown, 2017	P2 - left	Measured by Caleb M. Brown using ocular micrometer
165	Reptilia, Phrynosomatidae	Phyrnosoma asio	NA	5	NA	NA	5.82	0.82	116.4	TMP 1990.007.0354	Brown, 2017	P2 - right	Measured by Caleb M. Brown using ocular micrometer
166	Reptilia, Phrynosomatidae	Phyrnosoma asio	NA	3.94	NA	NA	4.51	0.57	114.467	TMP 1990.007.0016	Brown, 2017	S2 - left	Measured by Caleb M. Brown using ocular micrometer
167	Reptilia, Phrynosomatidae	Phyrnosoma asio	NA	4.18	NA	NA	5	0.82	119.617	TMP 1990.007.0017	Brown, 2017	S1 - left	Measured by Caleb M. Brown using ocular micrometer
168	Reptilia, Phrynosomatidae	Phyrnosoma asio	NA	4.43	NA	NA	4.67	0.25	105.418	TMP 1990.007.0018	Brown, 2017	S2 - right	Measured by Caleb M. Brown using ocular micrometer
169	Reptilia, Phrynosomatidae	Phyrnosoma asio	NA	4.59	NA	NA	5	0.41	108.932	TMP 1990.007.0019	Brown, 2017	S1 - right	Measured by Caleb M. Brown using ocular micrometer
170	Reptilia, Phrynosomatidae	Phyrnosoma asio	NA	4.1	NA	NA	4.59	0.49	111.951	TMP 1990.007.0020	Brown, 2017	F0 - right	Measured by Caleb M. Brown using ocular micrometer
171	Reptilia, Phrynosomatidae	Phyrnosoma asio	NA	4.76	NA	NA	5.17	0.41	108.613	TMP 1990.007.0021	Brown, 2017	F0 - left	Measured by Caleb M. Brown using ocular micrometer
172	Reptilia, Phrynosomatidae	Phyrnosoma asio	NA	4.18	NA	NA	4.59	0.41	109.809	TMP 1990.007.0022	Brown, 2017	P2 - left	Measured by Caleb M. Brown using ocular micrometer
173	Reptilia, Phrynosomatidae	Phyrnosoma asio	NA	5	NA	NA	5.41	0.41	108.2	TMP 1990.007.0023	Brown, 2017	P2 - right	Measured by Caleb M. Brown using ocular micrometer
174	Reptilia, Chamaeleonidae	Trioceros jacksonii	NA	15.31	NA	NA	25.14	9.83	164.206	USEC/H-2927	Brown, 2017	measured from scale	du Plessis et al, 2017, GigaScience, 6, 2017, 1–11
175	Reptilia, Chamaeleonidae	Trioceros jacksonii	NA	16.22	NA	NA	30.44	14.22	187.67	TMP 1990.007.0350	Brown, 2017	Rostral	Measured by Caleb M. Brown using digital calipers
176	Reptilia, Chamaeleonidae	Trioceros jacksonii	NA	21.54	NA	NA	31.36	9.82	145.59	TMP 1990.007.0350	Brown, 2017	L. Orbital	Measured by Caleb M. Brown using digital calipers
177	Reptilia, Chamaeleonidae	Trioceros jacksonii	NA	21.67	NA	NA	30.39	8.72	140.24	TMP 1990.007.0350	Brown, 2017	R. Oribital	Measured by Caleb M. Brown using digital calipers

## Sheet: Skin in Ceratopsia
	Genus	species	Specimen	Locality	Country	Formation	Age	Body region	Position of integument on specimen	Type of integument	Description of integument by authors	Number of patches	Dimension of patches	Pattern	Type of pattern	Scale diameter	Author(s)	Illustrated	References
1	Psittacosaurus	mongoliensis	AMNH FABR 6260	Red Mesa, Artsa Bogdo, Mongolian Peoples Republic, Asia, Oshih Basin	Mongolia	Öösh Formation (originally Ondai Sair Fm., now the "cannonball beds" of the Öösh Fm)	~130 Ma; Hauterivian?, Lower Cretaceous	Pes	Ventral surface of metatarsal II to IV near their distal ends	Reticulate scales	Pavement of small, rounded tubercles varying in size, no distinct pattern	1	2 cm2	No	NA	<1 mm	Sereno, 1987	No	Sereno, P. C. 1987. The ornithischian dinosaur Psittacosaurus from the Lower Cretaceous of Asia and the relationships of the Ceratopsia. Ph.D. Dissertation, Columbia University, New York, New York, 554pp.
2	Psittacosaurus	sp.	YFM-R001	Sihetun Village in Beipiao City, western Liaoning Province	China	Jianshangou Bed, Yixian Formation	Upper Barremian - Lower Aptian	Shoulder, forelimb	Near left humerus, scapula and distal end of the right femur	Hexagonal basement scales	Small, hexagonal or pentagonal scales, with a few quadrilateral and much smaller triangular scales. The surface of the scales is coarse. Irregular pattern, among which no much larger scales are scattered.	3	40 cm2, 25 cm2 near the humerus	Yes	Star-of-David pattern	3-4 mm	Ji & Bo, 1998; Glut, 2002; Ji, 1999	Yes, figure 2 of Ji (1999)	Ji, S. 1999. Initial report of fossil psittacosaurid skin impression from the uppermost Jurassic of Sihetun, northeastern China. Earth Science (Chikyu Kagaku) 53 (4): 314–316.
3	Psittacosaurus	sp.	MV 53	Nanjing, Liaoning Province	China	Jehol Biota, Yixian Formation	Probably Late/Upper Barremian - Early/Lower Aptian	Flank	Area of the ribs	Collagen fibers	Bands of fibers/filaments of ~0.4 mm in several different directions	1	24 cm2 (6*4 cm)	Yes	Herringbone pattern	NA	Feduccia et al., 2005; Lingham-Soliar, 2008	Yes, figures 11-13	Feduccia, A., Lingham-Soliar, T. and Hinchliffe, J. R. 2005. Do feathered dinosaurs exist? Testing the hypothesis on neontological and paleontological evidence. Journal of Morphology 266 (2): 125–166.; Lingham-Soliar, T. 2008. A unique cross section through the skin of the dinosaur Psittacosaurus from China showing a complex fibre architecture. Proceedings of the Royal Society B: Biological Scien…
4	Psittacosaurus	lujiatunensis	PKUV V105	?	China	?	?	Hips	Unknown, at least close to pelvis	Skin	?	?	?	?	?	?	Li et al., 2014	Yes	Li, Q., Clarke, J. A., Gao, K.-Q., Zhou, C.-F., Meng, Q., Li, D., D’Alba, L. and Shawkey, M. D. 2014. Melanosome evolution indicates a key physiological shift within feathered dinosaurs. Nature 507 (7492): 350–353.
5	Psittacosaurus	lujiatunensis	PKUV V1051	?	China	?	?	Tail + ?	Unknown, at least at the level of the tail	Skin	?	?	?	?	?	?	Li et al., 2014	Yes	Li, Q., Clarke, J. A., Gao, K.-Q., Zhou, C.-F., Meng, Q., Li, D., D’Alba, L. and Shawkey, M. D. 2014. Melanosome evolution indicates a key physiological shift within feathered dinosaurs. Nature 507 (7492): 350–353.
6	Psittacosaurus	sp.	SMF R 497	Jehol deposits of the Liaoning Province; most likely from the Sihetun locality, Beipiao County, Liaoning Province	China	Most likely Jianshangou Bed, Yixian Formation	126 - 130 Ma; Barremian/Aptian	Head, neck, shoulder, forelimbs, manus, flank, abdomen, hips, hindlimbs, tail	Covering most of the specimens, including the head, neck, limbs, belly and tail	Quadrangular, rectangular, polygonal, irregular basement scales; reticulate scales; Feature scales	See our paper	Multitude of patches	Virtually entire body	Yes	Star-of-David pattern	1-10 mm	Mayr et al., 2002; Lingham-Soliar & Plodowski, 2010; Vinther et al., 2016, 2021	Yes	Mayr, G., Peters, S. D., Plodowski, G. and Vogel, O. 2002. Bristle-like integumentary structures at the tail of the horned dinosaur Psittacosaurus. Naturwissenschaften 89 (8): 361–365.; Lingham-Soliar, T. and Plodowski, G. 2010. The integument of Psittacosaurus from Liaoning Province, China: taphonomy, epidermal patterns and color of a ceratopsian dinosaur. Naturwissenschaften 97 (5): 479–486.; M…
7	Protoceratops	andrewsi	AMNH FABR 6418	Shabarakh Usu, Omnogov Province	Mongolia	Bayn Dzak Member; Djadochta Formation	83.5 - 70.6 Ma; Upper Campanian	Head	A thin, hard, and wrinkled layer of matrix covers a considerable portion of the skull and jaws	Small pebbly basement scales	The wrinkling has a very skin-like appearance, and is most predominant on the left .side ofthe head over the orbit, at the corner of the mouth justin front of the jugal, and over the side of the frill and lateral temporal opening (see PLATE 13). As far as can be determined, it is without any trace of skin-structure.	>5	?	No	NA	?	Brown and Schlaikjer, 1940	Yes, plate 13	Brown, B. and Schlaikjer, E. M. 1940. The structure and relationships of Protoceratops. Annals of the New York Academy of Sciences 40 (3): 133–266.
8	Centrosaurus	apertus (= Monoclonius nasicornus)	AMNH FABR 5351	RTMP Quarry 105, Sand Creek; 100 feet below top of beds, north fork of Sand Creek, 12 miles below Steveville, Red Deer River, Alberta	Canada	Dinosaur Park Formation	83.5 - 70.6 Ma; Upper Campanian	Flank, abdomen?	Belly and sides	Polygonal basement scales; dermal plates	low, polygonal, non-imbricating scales; dermal plates symmetrical, equal in size, with narrow elongate base and a high median center	?	?	No	NA	?	Brown, 1917	No	Brown, B. 1917. A complete skeleton of the horned dinosaur Monoclonius, and description of a second skeleton showing skin impressions. Bulletin of the American Museum of Natural History 37 (10): 298–306.
9	Centrosaurus	apertus (= Monoclonius cutleri)	AMNH FABR 5427	north fork, Sand Creek, Alberta, right bank 50 feet above river Red Deer River	Canada	Oldman Formation	83.6 - 72.1 Ma; Campanian	Flank	lower end of femur but from the flank	Polygonal basement scales; Feature scales	small polygonal tubercles (five or six sides) and large round tubercles, all low and of the same height; large tubercles defined by a circumscribing groove and are uniformly round; they were disposed in rows over a part, probably the ventral surface of the body	1	?	No	NA	?	Brown, 1917; Lull, 1933	Yes, plate 18 of Brown (1917); Plate III.b of Lull (1933)	Brown, B. 1917. A complete skeleton of the horned dinosaur Monoclonius, and description of a second skeleton showing skin impressions. Bulletin of the American Museum of Natural History 37 (10): 298–306.; Lull, R. S. 1933. A revision of the Ceratopsia or horned dinosaurs. Peabody Museum of Natural History Bulletin 3: 1–175.
10	Chasmosaurus	belli (adult)	CMN 2245	Chasmosaurus type, Berry Creek, Red Deer River, Alberta	Canada	Dinosaur Park Formation	83.5 - 70.6 Ma; Upper Campanian	Hips	Pelvic arch and right flank	Polygonal basement scales; Feature scales	Large round plates [...] arranged in irregular, longitudinal rows, and [...] spaced from 2 to 4 inches apart. They vary considerably in size and are not always distinctly differientated from the larger tubercles either in size and shape. The large plates, one of which is 2 and 1/4th inches in diameter, were low, flat, circular, and are defined by a circumscribing groove. The edge of the many larg…	1	4180 cm2 (45.7*91.4 cm; 1.5*3 feet)	Yes	Rosette pattern	57 cm (feature scale; 2.25 inches); 55 mm (Dodson	Lambe, 1914; Sternberg, 1925; Lull, 1933	Yes, plate 1 of Sternberg (1925)	Lambe, L. M. 1914. On the fore-limb of a carnivorous dinosaur from the Belly River Formation of Alberta, and a new genus of Ceratopsia from the same horizon, with remarks on the integument of some Cretaceous herbivorous dinosaurs. The Ottawa Naturalist 27 (10): 129–135.; Sternberg, C. M. 1925. Integument of Chasmosaurus belli. Canadian Field Naturalist 39: 108–110.; Lull, R. S. 1933. A revision o…
11	Chasmosaurus	belli (juvenile)	UALVP 52613	Quarry Q255 in northeastern part of Dinosaur Provincial Park, Alberta	Canada	Dinosaur Park Formation	83.5 - 70.6 Ma; Upper Campanian	Flank, hindlimbs	Left flank, i.e., rib cage and region between rib cage and left femur	Polygonal basement scales	The integument consists of non-imbricating, polygonal basement scales that surround irregularly spaced, round shield feature scales.	1	?	No	NA	?	Currie et al., 2016	Yes	Currie, P. J., Holmes, R. B., Ryan, M. J. and Coy, C. 2016. A juvenile chasmosaurine ceratopsid (Dinosauria, Ornithischia) from the Dinosaur Park Formation, Alberta, Canada. Journal of Vertebrate Paleontology 36 (2): e1048348.
12	Nasutoceratops	titusi	UMNH VP 16800	Grand Staircase–Escalante National Monument, southern Utah	USA	Kaiparowits Formation	75.51 - 75.97 Ma; Upper Campanian	Shoulder, forelimb	Scapula and humerus	triangular basement scales; oval to subcircular and hexagonal feature scales;	The preserved integumentary impressions are described here in three ‘patches’: A, B, and C. These patches cover an area of 120, 84, and 25 cm2, respectively, and only patches B and C are preserved as both cast and mold (Fig. 17). Integument patch A is an array of tightly packed, oval to subcircular tubercles, varying in diameter from 2 to 8 mm, arranged in irregular rows and associated with the l…	3	120 cm2 (A); 84 cm (B); 25 cm2 (C)	Yes	Star-of-David pattern	2-8 mm (A); 5-11 mm (B); 8-11 mm (C)	Lund, 2010; Lund et al., 2016	Yes, figure 17 of Lund et al. (2016)	Lund, E. K. 2010. Nasutuceratops titusi, a new basal centrosaurine dinosaur (Ornithischia: Ceratopsidae) from the Upper Cretaceous Kaiparowits Formation, southern Utah. MSc. Dissertation, 158pp.; Lund, E. K., Sampson, S. D. and Loewen, M. A. 2016. Nasutoceratops titusi (Ornithischia, Ceratopsidae), a basal centrosaurine ceratopsid from the Kaiparowits Formation, southern Utah. Journal of Vertebra…
13	Triceratops	horridus	HMNS PV.1506	Zerbst Ranch, Converse County, Niobrara (county), Wyoming	USA	Lance Formation	72.1 - 66.0 Ma; Maastrichtian	Neck, forelimb, flank, abdomen	Different region of the body (femur and ilium; left flank; ventral side of cervical vertebrae)		Subsequent preparation has revealed at least six major integument types from different regions of the body, some in excess of one square meter in area, and with tubercles up to 10 cm across. Some of the skin resembles the single patch found with Chasmosaurus belli, the only reported integument for Chasmosaurinae. However, other textures bear no resemblance what so ever.	3?	?	No	NA	100 mm (feature scales)	Larson et al., 2007	No	Larson, P., Larson, M., Ott, C. and Robert, B. 2007. Skinning a Triceratops. Journal of Vertebrate Paleontology 27 (3): 104A-104A.
14	Triceratops	prorsus	CMNFV 56508	north side, Frenchman River, Eastend, Saskatchewan [PBDB 152399]	Canada	Frenchman Formation	70.6 - 66.0 Ma; Maastrichtian	Head	Frill, head	Polygonal basement scales	There was a small section of what looks to be beautifully fossilized dinosaur skin. The polygonal features seen in this photo appear to be the remains of fossilized skin preserved in association with the frill.	1	?	No	NA	?	McDonald, 2018	Yes	McDonald, A. 2018. Triceratops skull delivers a Wow! of a Christmas gift. Canadian Museum of Nature Blog.
15	Triceratops	sp.	?	Jordan, Garfield County, Montana	USA	Hell Creek Formation	Maastrichtian	?	?	NA	Skin impression in clay	?	?	?	?	?	Happ & Morrow, 1997	No	Happ, J. W., & Morrow, C. M. 1997. Bone modification of subadult Triceratops (Dinosauria: Ceratopsidae) by crocodilian and theropod dining. Journal of Vertebrate Paleontology, 17(3), 51A.
16	Triceratops	sp.	?	Montana	USA	?	?	Head	Skull	?	?	?	?	No	NA	?	Lessem, 1989	No	Lessem, D. 1989. Skinning the dinosaur. Discover, 10(3), 38–44. Chicago.

## Sheet: Graph
Taxon	Taxon	Bony core length (mm)	Total length (mm)	Sheath only length (mm)	% increase in length	Log bony core length	Log sheath length
Psittacosaurus sp. (model 1)	Psittacosaurus	54	64	10	118.519	1.73239	1
Borealopelta markmitchelli	Borealopelta	133.6	160.8	27.2	120.359	2.12581	1.43457
Borealopelta markmitchelli	Borealopelta	129.8	160.9	31.1	123.96	2.11327	1.49276
Borealopelta markmitchelli	Borealopelta	132.9	149.2	16.3	112.265	2.12352	1.21219
Borealopelta markmitchelli	Borealopelta	141.6	162.7	21.1	114.901	2.15106	1.32428
Borealopelta markmitchelli	Borealopelta	145.4	160.2	14.8	110.179	2.16256	1.17026
Borealopelta markmitchelli	Borealopelta	189.4	228.8	39.4	120.803	2.27738	1.5955
Borealopelta markmitchelli	Borealopelta	192.6	231.2	38.6	120.042	2.28466	1.58659
Borealopelta markmitchelli	Borealopelta	161.1	182.2	21.1	113.097	2.2071	1.32428
Borealopelta markmitchelli	Borealopelta	229.9	255	25.1	110.918	2.36154	1.39967
Borealopelta markmitchelli	Borealopelta	237.4	279.9	42.5	117.902	2.37548	1.62839
Borealopelta markmitchelli	Borealopelta	125.5	146.3	20.78	116.574	2.09864	1.31765
Borealopelta markmitchelli	Borealopelta	117.1	127.7	10.6	109.052	2.06856	1.02531
Borealopelta markmitchelli	Borealopelta	237.6	262.6	25	110.522	2.37585	1.39794
Borealopelta markmitchelli	Borealopelta	239.2	287.2	48	120.067	2.37876	1.68124
Borealopelta markmitchelli	Borealopelta	137.7	147.4	9.7	107.044	2.13893	0.986772
Borealopelta markmitchelli	Borealopelta	144.5	153.2	8.7	106.021	2.15987	0.939519
Borealopelta markmitchelli	Borealopelta	397.3	528.4	131.1	132.998	2.59912	2.1176
Borealopelta markmitchelli	Borealopelta	152.4	161.4	9	105.906	2.18298	0.954243
Borealopelta markmitchelli	Borealopelta	151.8	165.9	14.1	109.289	2.18127	1.14922
Borealopelta markmitchelli	Borealopelta	129.7	146.9	17.2	113.261	2.11294	1.23553
Borealopelta markmitchelli	Borealopelta	80.3	83.2	2.9	103.611	1.90472	0.462398
Borealopelta markmitchelli	Borealopelta	126.1	131.3	5.2	104.124	2.10072	0.716003
Borealopelta markmitchelli	Borealopelta	96.5	99.8	3.3	103.42	1.98453	0.518514
Borealopelta markmitchelli	Borealopelta	68	72.4	4.4	106.471	1.83251	0.643453
Borealopelta markmitchelli	Borealopelta	52.5	53.2	0.7	101.333	1.72016	-0.154902
Antilocapra americana	Antilocapra	111	284.7	173.7	256.486	2.04532	2.2398
Antilocapra americana	Antilocapra	139.3	308.3	169	221.321	2.14395	2.22789
Antilocapra americana	Antilocapra	148.3	360.7	212.3	243.223	2.17114	2.32695
Bison bison	Bison	224	365	141	162.946	2.35025	2.14922
Bison bison	Bison	180	407	227	226.111	2.25527	2.35603
Bison bison	Bison	169	355	187	210.059	2.22789	2.27184
Bison bison	Bison	159	374	216	235.22	2.2014	2.33445
Bison bison	Bison	150	392	242	261.333	2.17609	2.38382
Bison bison	Bison	167	356	189	213.174	2.22272	2.27646
Bison bison	Bison	197	370	173	187.817	2.29447	2.23805
Bison bison	Bison	254	368	114	144.882	2.40483	2.0569
Bison bison	Bison	288	444	156	154.167	2.45939	2.19312
Bison bison	Bison	275	477	202	173.455	2.43933	2.30535
Bison bison	Bison	266	426	160	160.15	2.42488	2.20412
Bison bison	Bison	276	530	254	192.029	2.44091	2.40483
Bison bison	Bison	248	439	191	177.016	2.39445	2.28103
Bison bison	Bison	261	448	187	171.648	2.41664	2.27184
Bison bison	Bison	238	407	170	171.008	2.37658	2.23045
Bison bison	Bison	266	450	185	169.173	2.42488	2.26717
Bison bison	Bison	253	514	261	203.162	2.40312	2.41664
Bison bison	Bison	182	324	142	178.022	2.26007	2.15229
Bos taurus	Bos	173	297	124	171.676	2.23805	2.09342
Bos taurus	Bos	191	319	128	167.016	2.28103	2.10721
Bos taurus	Bos	257	420	163	163.424	2.40993	2.21219
Bos taurus	Bos	266	429	163	161.278	2.42488	2.21219
Bos taurus	Bos	271	417	146	153.875	2.43297	2.16435
Bos taurus	Bos	293	471	179	160.751	2.46687	2.25285
Bos taurus	Bos	356	498	143	139.888	2.55145	2.15534
Bos taurus	Bos	646	960	314	148.607	2.81023	2.49693
Bos taurus	Bos	261	343	82	131.418	2.41664	1.91381
Bos taurus	Bos	267	384	117	143.82	2.42651	2.06819
Bos taurus	Bos	274	374	100	136.496	2.43775	2
Bos taurus	Bos	275	392	118	142.545	2.43933	2.07188
Bos taurus	Bos	278	388	111	139.568	2.44404	2.04532
Bos taurus	Bos	283	379	96	133.922	2.45179	1.98227
Bos taurus	Bos	339	403	64	118.879	2.5302	1.80618
Bos taurus	Bos	366	464	98	126.776	2.56348	1.99123
Bos taurus	Bos	427	519	92	121.546	2.63043	1.96379
Bos taurus	Bos	445	556	111	124.944	2.64836	2.04532
Capra ibex ibex	Capra	570	930	360	163.158	2.75587	2.5563
Capra ibex siberica	Capra	377	1204	827	319.363	2.57634	2.91751
Oreamnos harringtoni	Oreamnos	72.6	164.4	91.8	226.446	1.86094	1.96284
Oreamnos americanus	Oreamnos	93.6	221.6	128	236.752	1.97128	2.10721
Oreamnos americanus	Oreamnos	66.8	197.3	130.5	295.359	1.82478	2.11561
Oreamnos americanus	Oreamnos	74	173.7	99.7	234.73	1.86923	1.9987
Oreamnos americanus	Oreamnos	68.5	186.7	118.2	272.555	1.83569	2.07262
Oreamnos americanus	Oreamnos	68.7	193.2	124.5	281.223	1.83696	2.09517
Oreamnos americanus	Oreamnos	75.7	175	99.3	231.176	1.8791	1.99695
Oreamnos americanus	Oreamnos	67.8	179.5	111.7	264.749	1.83123	2.04805
Oreamnos americanus	Oreamnos	82.5	196.3	113.8	237.939	1.91645	2.05614
Oreamnos americanus	Oreamnos	82.7	210.8	128.2	254.897	1.91751	2.10789
Oreamnos americanus	Oreamnos	75.2	191.3	116.2	254.388	1.87622	2.06521
Oreamnos americanus	Oreamnos	73	177.7	104.7	243.425	1.86332	2.01995
Oreamnos americanus	Oreamnos	93	219.3	126.3	235.806	1.96848	2.1014
Oreamnos americanus	Oreamnos	92.2	231.5	139.3	251.085	1.96473	2.14395
Oreamnos americanus	Oreamnos	86.5	166.3	79.8	192.254	1.93702	1.902
Oreamnos americanus	Oreamnos	82.7	174.2	91.5	210.641	1.91751	1.96142
Oreamnos americanus	Oreamnos	90	194.7	104.7	216.333	1.95424	2.01995
Oreamnos americanus	Oreamnos	84.5	194.2	109.7	229.822	1.92686	2.04021
Oreamnos americanus	Oreamnos	60.7	209.7	149	345.47	1.78319	2.17319
Ovis nivicola	Ovis	228	740	512	324.561	2.35793	2.70927
Ovis dalli	Ovis	275	1110	835	403.636	2.43933	2.92169
Ovis ammon	Ovis	404	1078	674	266.832	2.60638	2.82866
Ovis canadensis nelsoni	Ovis	422	1096	674	259.716	2.62531	2.82866
Ovis canadensis canadensis	Ovis	387.5	1230	842.5	317.419	2.58827	2.92557
Phrynosoma solare	Phrynosoma	6.35	6.84	0.49	107.717	0.802774	-0.309804
Phrynosoma solare	Phrynosoma	6.23	7.13	0.9	114.446	0.794488	-0.0457575
Phrynosoma solare	Phrynosoma	3.32	3.78	0.46	113.855	0.521138	-0.337242
Phrynosoma solare	Phrynosoma	3.51	3.75	0.24	106.838	0.545307	-0.619789
Phrynosoma cornutum	Phrynosoma	9.56	10.23	0.67	107.008	0.980458	-0.173925
Phrynosoma cornutum	Phrynosoma	2.72	3.4	0.68	125	0.434569	-0.167491
Phrynosoma cornutum	Phrynosoma	2.77	3.33	0.56	120.217	0.44248	-0.251812
Phrynosoma platyrhinos	Phrynosoma	3.69	4.1	0.41	111.111	0.567026	-0.387216
Phrynosoma platyrhinos	Phrynosoma	3.84	4.35	0.51	113.281	0.584331	-0.29243
Phrynosoma platyrhinos	Phrynosoma	1.64	2.02	0.38	123.171	0.214844	-0.420216
Phrynosoma platyrhinos	Phrynosoma	1.58	1.76	0.18	111.392	0.198657	-0.744727
Phrynosoma taurus	Phrynosoma	3.28	3.45	0.17	105.183	0.515874	-0.769551
Phrynosoma taurus	Phrynosoma	3.17	3.43	0.26	108.202	0.501059	-0.585027
Phrynosoma modestum	Phrynosoma	3.18	3.54	0.36	111.321	0.502427	-0.443697
Phrynosoma modestum	Phrynosoma	3.49	3.69	0.2	105.731	0.542825	-0.69897
Phrynosoma macallii	Phrynosoma	3.79	4.88	1.09	128.76	0.578639	0.0374265
Phrynosoma macallii	Phrynosoma	3.45	4.27	0.82	123.768	0.537819	-0.0861861
Phrynosoma braconnieri	Phrynosoma	2.1	2.56	0.46	121.905	0.322219	-0.337242
Phrynosoma braconnieri	Phrynosoma	3.12	3.44	0.32	110.256	0.494155	-0.49485
Phrynosoma asio	Phrynosoma	4.98	5.6	0.62	112.45	0.697229	-0.207608
Phrynosoma asio	Phrynosoma	4.74	5.09	0.35	107.384	0.675778	-0.455932
Phrynosoma asio	Phrynosoma	6.39	7.37	0.98	115.336	0.805501	-0.00877392
Phrynosoma asio	Phrynosoma	6.48	7.44	0.96	114.815	0.811575	-0.0177288
Phyrnosoma asio	Phrynosoma	4.26	5.25	0.98	123.239	0.62941	-0.00877392
Phyrnosoma asio	Phrynosoma	4.51	5	0.49	110.865	0.654177	-0.309804
Phyrnosoma asio	Phrynosoma	4.51	5.25	0.74	116.408	0.654177	-0.130768
Phyrnosoma asio	Phrynosoma	4.84	5.74	0.9	118.595	0.684845	-0.0457575
Phyrnosoma asio	Phrynosoma	4.67	5.41	0.74	115.846	0.669317	-0.130768
Phyrnosoma asio	Phrynosoma	4.43	5	0.57	112.867	0.646404	-0.244125
Phyrnosoma asio	Phrynosoma	4.59	5.41	0.82	117.865	0.661813	-0.0861861
Phyrnosoma asio	Phrynosoma	5	5.82	0.82	116.4	0.69897	-0.0861861
Phyrnosoma asio	Phrynosoma	3.94	4.51	0.57	114.467	0.595496	-0.244125
Phyrnosoma asio	Phrynosoma	4.18	5	0.82	119.617	0.621176	-0.0861861
Phyrnosoma asio	Phrynosoma	4.43	4.67	0.25	105.418	0.646404	-0.60206
Phyrnosoma asio	Phrynosoma	4.59	5	0.41	108.932	0.661813	-0.387216
Phyrnosoma asio	Phrynosoma	4.1	4.59	0.49	111.951	0.612784	-0.309804
Phyrnosoma asio	Phrynosoma	4.76	5.17	0.41	108.613	0.677607	-0.387216
Phyrnosoma asio	Phrynosoma	4.18	4.59	0.41	109.809	0.621176	-0.387216
Phyrnosoma asio	Phrynosoma	5	5.41	0.41	108.2	0.69897	-0.387216
Trioceros jacksonii	Trioceros	15.31	25.14	9.83	164.206	1.18498	0.992554
Trioceros jacksonii	Trioceros	16.22	30.44	14.22	187.67	1.21005	1.1529
Trioceros jacksonii	Trioceros	21.54	31.36	9.82	145.59	1.33325	0.992111
Trioceros jacksonii	Trioceros	21.67	30.39	8.72	140.24	1.33586	0.940516

## Sheet: Skin vs. body mass
	Taxon	Specimen number for largest basement scales	Source	References on scale size	Body mass (kg)	Specimen used for body mass	Data on Body mass	References on Body mass	Largest basement scale (mm)	Median basement scale diameter (mm)	Taxon	Log body mass	Log scale length	Remarks
Theropoda	Carnotaurus	MACN CH 894	Hendrickx & Bell, 2021	Hendrickx, C. and Bell, P. R. 2021. The scaly skin of the abelisaurid Carnotaurus sastrei (Theropoda: Ceratosauria) from the Upper Cretaceous of Patagonia. Cretaceous Research 128: 104994.	1641.83	MACN CH 894	Data from Benson et al. (2014)	Benson, R. B. J., Campione, N. E., Carrano, M. T., Mannion, P. D., Sullivan, C., Upchurch, P. and Evans, D. C. 2014. Rates of dinosaur body mass evolution indicate 170 Million years of sustained ecological innovation on the avian stem lineage. PLOS Biology 12 (5): e1001853.	13	3.5	Carnotaurus	3.21533	1.11394
	Allosaurus juvenile	WDC DMQ-A 053	Hendrickx et al., in press	Hendrickx, C., Bell, P. R., Pittman, M., Milner, A. R. C., Cuesta, E., O’Connor, J., Loewen, M. A., Currie, P. J., Mateus, O., Kaye, T. G. and Delcourt, R. in press. Morphology and distribution of scales, dermal ossifications, and other non-feather integumentary structures in non-avialan theropod dinosaurs. Biological Reviews.	121.371	WDC DMQ-A 053	Using formula from Benson et al. (2014) and TC in WDC DMQ-A 053 (Data from Loewen, 2010; PhD)	Loewen, M. A. 2010. Variation in the Late Jurassic theropod dinosaur Allosaurus: Ontogenetic, functional, and taxonomic implications. Ph.D. Dissertation, The University of Utah, Texas, Utah, USA, 326pp.; Benson, R. B. J., Campione, N. E., Carrano, M. T., Mannion, P. D., Sullivan, C., Upchurch, P. and Evans, D. C. 2014. Rates of dinosaur body mass evolution indicate 170 Million years of sustained …	3		Allosaurus juvenile	2.08411	0.477121
	Allosaurus adult (possibly a sauropod [see Hendrickx et al. in press], therefore excluded from Fig. 10)	SMA 0005	Hendrickx et al., in press	Hendrickx, C., Bell, P. R., Pittman, M., Milner, A. R. C., Cuesta, E., O’Connor, J., Loewen, M. A., Currie, P. J., Mateus, O., Kaye, T. G. and Delcourt, R. in press. Morphology and distribution of scales, dermal ossifications, and other non-feather integumentary structures in non-avialan theropod dinosaurs. Biological Reviews.	1995.23	SMA 0005	Using formula from Benson et al. (2014) and FC in SMA 0005 (Data from Loewen, 2010; PhD)	Loewen, M. A. 2010. Variation in the Late Jurassic theropod dinosaur Allosaurus: Ontogenetic, functional, and taxonomic implications. Ph.D. Dissertation, The University of Utah, Texas, Utah, USA, 326pp.; Benson, R. B. J., Campione, N. E., Carrano, M. T., Mannion, P. D., Sullivan, C., Upchurch, P. and Evans, D. C. 2014. Rates of dinosaur body mass evolution indicate 170 Million years of sustained …	20	20	Allosaurus adult	3.29999	1.30103
	Albertosaurus	RTMP 1994.186.0001	Hendrickx et al., in press	Hendrickx, C., Bell, P. R., Pittman, M., Milner, A. R. C., Cuesta, E., O’Connor, J., Loewen, M. A., Currie, P. J., Mateus, O., Kaye, T. G. and Delcourt, R. in press. Morphology and distribution of scales, dermal ossifications, and other non-feather integumentary structures in non-avialan theropod dinosaurs. Biological Reviews.	2010.98	ROM 807	No data on RTMP 1994.186.0001 so ROM 807 is used from the Data of Benson et al. (2014)	Benson, R. B. J., Campione, N. E., Carrano, M. T., Mannion, P. D., Sullivan, C., Upchurch, P. and Evans, D. C. 2014. Rates of dinosaur body mass evolution indicate 170 Million years of sustained ecological innovation on the avian stem lineage. PLOS Biology 12 (5): e1001853.	4	1.9	Albertosaurus	3.30341	0.60206
	Daspletosaurus	RTMP 2001.036.0001	Hendrickx et al., in press	Hendrickx, C., Bell, P. R., Pittman, M., Milner, A. R. C., Cuesta, E., O’Connor, J., Loewen, M. A., Currie, P. J., Mateus, O., Kaye, T. G. and Delcourt, R. in press. Morphology and distribution of scales, dermal ossifications, and other non-feather integumentary structures in non-avialan theropod dinosaurs. Biological Reviews.	2557.75	RTMP 2001.036.0001	Using formula from Benson et al. (2014) and FC in RTMP 2001.036.0001 (Data from Currie, pers. dataset)	Benson, R. B. J., Campione, N. E., Carrano, M. T., Mannion, P. D., Sullivan, C., Upchurch, P. and Evans, D. C. 2014. Rates of dinosaur body mass evolution indicate 170 Million years of sustained ecological innovation on the avian stem lineage. PLOS Biology 12 (5): e1001853.	3	3	Daspletosaurus	3.40786	0.477121
	Gorgosaurus	CMN 2120	Hendrickx et al., in press	Hendrickx, C., Bell, P. R., Pittman, M., Milner, A. R. C., Cuesta, E., O’Connor, J., Loewen, M. A., Currie, P. J., Mateus, O., Kaye, T. G. and Delcourt, R. in press. Morphology and distribution of scales, dermal ossifications, and other non-feather integumentary structures in non-avialan theropod dinosaurs. Biological Reviews.	2487.17	CMN 2120	Data from Benson et al. (2014)	Benson, R. B. J., Campione, N. E., Carrano, M. T., Mannion, P. D., Sullivan, C., Upchurch, P. and Evans, D. C. 2014. Rates of dinosaur body mass evolution indicate 170 Million years of sustained ecological innovation on the avian stem lineage. PLOS Biology 12 (5): e1001853.	4.9	3.6	Gorgosaurus	3.3957	0.690196
	Tarbosaurus	MPC 107/6A	Hendrickx et al., in press	Hendrickx, C., Bell, P. R., Pittman, M., Milner, A. R. C., Cuesta, E., O’Connor, J., Loewen, M. A., Currie, P. J., Mateus, O., Kaye, T. G. and Delcourt, R. in press. Morphology and distribution of scales, dermal ossifications, and other non-feather integumentary structures in non-avialan theropod dinosaurs. Biological Reviews.	2575.17	MPC 107/6A	Using formula from Benson et al. (2014) and estimated FL (Currie, pers. dataset)	Benson, R. B. J., Campione, N. E., Carrano, M. T., Mannion, P. D., Sullivan, C., Upchurch, P. and Evans, D. C. 2014. Rates of dinosaur body mass evolution indicate 170 Million years of sustained ecological innovation on the avian stem lineage. PLOS Biology 12 (5): e1001853.	2.9	2	Tarbosaurus	3.41081	0.462398
	Tyrannosaurus	HMNS 2006.1743.01 ("Wy-rex"; formerly BHI 6230)	Hendrickx et al., in press	Hendrickx, C., Bell, P. R., Pittman, M., Milner, A. R. C., Cuesta, E., O’Connor, J., Loewen, M. A., Currie, P. J., Mateus, O., Kaye, T. G. and Delcourt, R. in press. Morphology and distribution of scales, dermal ossifications, and other non-feather integumentary structures in non-avialan theropod dinosaurs. Biological Reviews.	5185.86	HMNS 2006.1743.01 ("Wy-rex"; formerly BHI 6230)	Using formula from Benson et al. (2014) and FC (Currie, pers. dataset)	Benson, R. B. J., Campione, N. E., Carrano, M. T., Mannion, P. D., Sullivan, C., Upchurch, P. and Evans, D. C. 2014. Rates of dinosaur body mass evolution indicate 170 Million years of sustained ecological innovation on the avian stem lineage. PLOS Biology 12 (5): e1001853.	1	1	Tyrannosaurus	3.71482	0
	Juravenator	JME Sch 200	Bell & Hendrickx, 2021	Bell, P. R. and Hendrickx, C. 2021. Epidermal complexity in the theropod dinosaur Juravenator from the Late Jurassic of Germany. Palaeontology 64 (2): 203–223.	0.671583	JME Sch 200 (using FAP)	Modified data from Benson et al. (2014)	Benson, R. B. J., Campione, N. E., Carrano, M. T., Mannion, P. D., Sullivan, C., Upchurch, P. and Evans, D. C. 2014. Rates of dinosaur body mass evolution indicate 170 Million years of sustained ecological innovation on the avian stem lineage. PLOS Biology 12 (5): e1001853.	1.5	1.5	Juravenator	-0.1729	0.176091
Sauropodomorpha	Mamenchisaurus	ZDM 0083	Ouyang & Ye, 2002	Ouyang, H. and Ye, Y. 2002. The First Mamenchisauria Skeleton with Complete Skull: Mamenchisaurus youngi. Sichuan Publishing House of Science and Technology, Chengdu, China, 111pp.	6240.44	ZDM 0083	Data from Benson et al. (2014)	Benson, R. B. J., Campione, N. E., Carrano, M. T., Mannion, P. D., Sullivan, C., Upchurch, P. and Evans, D. C. 2014. Rates of dinosaur body mass evolution indicate 170 Million years of sustained ecological innovation on the avian stem lineage. PLOS Biology 12 (5): e1001853.	15		Mamenchisaurus	3.79522	1.17609
	Diplodocus sp.	SMA 0029/04	Hendrickx, personal measurements from photos using ImageJ	/	14982	USNM 10865; HMNS 175 (= CM 662); CM 84	Data from Benson et al. (2014); mean Diplodocus body mass from 3 specimens	Benson, R. B. J., Campione, N. E., Carrano, M. T., Mannion, P. D., Sullivan, C., Upchurch, P. and Evans, D. C. 2014. Rates of dinosaur body mass evolution indicate 170 Million years of sustained ecological innovation on the avian stem lineage. PLOS Biology 12 (5): e1001853.	35		Diplodocus	4.17557	1.54407	19442 for the mean body mass of Diplodocus for Holtz (https://www.geol.umd.edu/~tholtz/G104/lectures/104size.html)
	Diplodocus sp.	MDS-2019-028	Gallagher et al., 2021	Gallagher, T., Poole, J. and Schein, J. P. 2021. Evidence of integumentary scale diversity in the late Jurassic sauropod Diplodocus sp. from the Mother’s Day Quarry, Montana. PeerJ 9: e11202.	14982	USNM 10865; HMNS 175 (= CM 662); CM 84	Data from Benson et al. (2014); mean Diplodocus body mass from 3 specimens	Benson, R. B. J., Campione, N. E., Carrano, M. T., Mannion, P. D., Sullivan, C., Upchurch, P. and Evans, D. C. 2014. Rates of dinosaur body mass evolution indicate 170 Million years of sustained ecological innovation on the avian stem lineage. PLOS Biology 12 (5): e1001853.	10		Diplodocus	4.17557	1	19442 for the mean body mass of Diplodocus for Holtz (https://www.geol.umd.edu/~tholtz/G104/lectures/104size.html)
	Camarasaurus	SMA 0002	Tschopp et al., 2015	Tschopp, E. D., Oliver, W. and Thomas, F. 2015. Articulated bone sets of manus and pedes of Camarasaurus (Sauropoda, Dinosauria). Palaeontologia Electronica 18.2.44A: 1–65.	11006.8	GMNH 101	Data from Benson et al. (2014); mean Camarasaurus body mass from 2 specimens	Benson, R. B. J., Campione, N. E., Carrano, M. T., Mannion, P. D., Sullivan, C., Upchurch, P. and Evans, D. C. 2014. Rates of dinosaur body mass evolution indicate 170 Million years of sustained ecological innovation on the avian stem lineage. PLOS Biology 12 (5): e1001853.	10		Camarasaurus	4.04166	1
	Tehuelchesaurus	MPEF-PV 1125	Giménez, 2007	Giménez, O. del V. 2007. Skin impressions of Tehuelchesaurus (Sauropoda) from the Upper Jurassic of Patagonia. Revista del Museo Argentino de Ciencias Naturales 9 (2): 119–124.	41268.7	MPEF-PV 1125	Data from Benson et al. (2014)	Benson, R. B. J., Campione, N. E., Carrano, M. T., Mannion, P. D., Sullivan, C., Upchurch, P. and Evans, D. C. 2014. Rates of dinosaur body mass evolution indicate 170 Million years of sustained ecological innovation on the avian stem lineage. PLOS Biology 12 (5): e1001853.	20		Tehuelchesaurus	4.61562	1.30103
	Haestasaurus	NHMUK R1868	Hooley, 1917; Upchurch et al., 2015	Hooley, R. W. 1917. II.—On the Integument of Iguanodon bernissartensis, Boulenger, and of Morosaurus becklesii, Mantell. Geological Magazine 4 (4): 148–150.	2761.18	NHMUK R1870	Using formula from Benson et al. (2014) and HC (Upchurch et al., 2015) and Ampelosaurus body mass	Benson, R. B. J., Campione, N. E., Carrano, M. T., Mannion, P. D., Sullivan, C., Upchurch, P. and Evans, D. C. 2014. Rates of dinosaur body mass evolution indicate 170 Million years of sustained ecological innovation on the avian stem lineage. PLOS Biology 12 (5): e1001853.; Upchurch, P., Mannion, P. D. and Taylor, M. P. 2015. The anatomy and phylogenetic relationships of “Pelorosaurus“ becklesii…	25		Haestasaurus	3.44109	1.39794
Basal ornithischia	Kulindadromeus	INREC K3-3/95 (n.b., caudo-ventral scales as basement scales because the largest tail scales are scutate dorsal scales)	Godefroit et al., 2020	Godefroit, P., Sinitsa, S. M., Cincotta, A., McNamara, M. E., Reshetova, S. A. and Dhouailly, D. 2020. Integumentary structures in Kulindadromeus zabaikalicus, a basal neornithischian dinosaur from the Jurassic of Siberia. In: Foth, C. and Rauhut, O. W. M. (eds.), The Evolution of Feathers: From Their Origin to the Present, 47–65. Springer International Publishing, Cham.	2	Unspecified	Data from Paul (2016)	Benson, R. B. J., Campione, N. E., Carrano, M. T., Mannion, P. D., Sullivan, C., Upchurch, P. and Evans, D. C. 2014. Rates of dinosaur body mass evolution indicate 170 Million years of sustained ecological innovation on the avian stem lineage. PLOS Biology 12 (5): e1001853.	5		Kulindadromaeus	0.30103	0.69897
Ceratopsia	Psittacosaurus	SMF R 4970	This study	/	24.221	SMF R 4970	Using formula from Benson et al. (2014) with FL (170 mm) and other Psittacosaurus specimens	Benson, R. B. J., Campione, N. E., Carrano, M. T., Mannion, P. D., Sullivan, C., Upchurch, P. and Evans, D. C. 2014. Rates of dinosaur body mass evolution indicate 170 Million years of sustained ecological innovation on the avian stem lineage. PLOS Biology 12 (5): e1001853.	6.8		Psittacosaurus	1.38419	0.832509
	Centrosaurus	AMNH FARB 5427	Hendrickx, personal measurements from photos using ImageJ	/	2492.64	YPM 2015	Data from Benson et al. (2014); YPM 2015 and AMNH 5427 share very close FL	Benson, R. B. J., Campione, N. E., Carrano, M. T., Mannion, P. D., Sullivan, C., Upchurch, P. and Evans, D. C. 2014. Rates of dinosaur body mass evolution indicate 170 Million years of sustained ecological innovation on the avian stem lineage. PLOS Biology 12 (5): e1001853.	10		Centrosaurus	3.39666	1	Scales measured using tibia length of 500 next to patch of skin in Plate xx of xx
	Chasmosaurus	NMC 2245	Lambe, 1914	Lambe, L. M. 1914. On the fore-limb of a carnivorous dinosaur from the Belly River Formation of Alberta, and a new genus of Ceratopsia from the same horizon, with remarks on the integument of some Cretaceous herbivorous dinosaurs. The Ottawa Naturalist 27 (10): 129–135.	3256.52	ROM 839; CMN 2280	Data from Benson et al. (2014) using correlations with body mass from other Chasmosaurus specimens	Benson, R. B. J., Campione, N. E., Carrano, M. T., Mannion, P. D., Sullivan, C., Upchurch, P. and Evans, D. C. 2014. Rates of dinosaur body mass evolution indicate 170 Million years of sustained ecological innovation on the avian stem lineage. PLOS Biology 12 (5): e1001853.	25		Chasmosaurus	3.51275	1.39794
	Nasutoceratops	UMNH VP 16800	Lund et al., 2016	Lund, E. K., Sampson, S. D. and Loewen, M. A. 2016. Nasutoceratops titusi (Ornithischia, Ceratopsidae), a basal centrosaurine ceratopsid from the Kaiparowits Formation, southern Utah. Journal of Vertebrate Paleontology 36 (2): e1054936.	1500	Unspecified	Data from Paul (2016)	Paul, G. S. 2016. The Princeton Field Guide to Dinosaurs. Princeton University Press, 361pp.	20		Nasutoceratops	3.17609	1.30103	Measured on patch "B" using ImageJ and Lund et al. (2016)'s scale of 5 cm.
	Triceratops	HMNS PV.1506	Hendrickx, personal measurements from photos using ImageJ	/	13536.1	AMNH 5033	Data from Benson et al. (2014)	Benson, R. B. J., Campione, N. E., Carrano, M. T., Mannion, P. D., Sullivan, C., Upchurch, P. and Evans, D. C. 2014. Rates of dinosaur body mass evolution indicate 170 Million years of sustained ecological innovation on the avian stem lineage. PLOS Biology 12 (5): e1001853.	90		Triceratops	4.13149	1.95424
Thyreophora	Scelidosaurus	BRSMG Ce12785	Norman, 2020	Norman, D. B. 2020. Scelidosaurus harrisonii from the Early Jurassic of Dorset, England: the dermal skeleton. Zoological Journal of the Linnean Society 190 (1): 1–53.	270	Unspecified	Data from Paul (2016)	Paul, G. S. 2016. The Princeton Field Guide to Dinosaurs. Princeton University Press, 361pp.	4		Scelidosaurus	2.43136	0.60206	114 to 323 kg based on Campione & Evans (2020); 645 kg from Holtz (https://www.geol.umd.edu/~tholtz/G104/lectures/104size.html)
	Hesperosaurus	SMA 0018	Christiansen & Tschopp, 2010	Christiansen, N. A. and Tschopp, E. 2010. Exceptional stegosaur integument impressions from the Upper Jurassic Morrison Formation of Wyoming. Swiss Journal of Geosciences 103 (2): 163–171.	3500	Unspecified	Data from Paul (2016)	Paul, G. S. 2016. The Princeton Field Guide to Dinosaurs. Princeton University Press, 361pp.	5		Hesperosaurus	3.54407	0.69897	4950 kg from Holtz (https://www.geol.umd.edu/~tholtz/G104/lectures/104size.html)
	Gigantspinosaurus	ZDM 0019	Xing et al., 2008	Xing, L. D., Peng, G. Z. and Shu, C. K. 2008. Stegosaurian skin impressions from the Upper Jurassic Shangshaximiao Formation, Zigong, Sichuan, China: A new observation. Geological Bulletin of China 27: 1049–1053.	2220.86	ZDM 0019	Data from Benson et al. (2014)	Benson, R. B. J., Campione, N. E., Carrano, M. T., Mannion, P. D., Sullivan, C., Upchurch, P. and Evans, D. C. 2014. Rates of dinosaur body mass evolution indicate 170 Million years of sustained ecological innovation on the avian stem lineage. PLOS Biology 12 (5): e1001853.	9.2		Gigantspinosaurus	3.34652	0.963788
	Liaoningosaurus	IVPP V12560	Xu et al., 2001	Xu, X., Wang, X.-L. and You, H.-L. 2001. A juvenile ankylosaur from China. Naturwissenschaften 88 (7): 297–300.	0.32	IVPP V12560	Data from Benson et al. (2014) using FL (25 mm; Han et al., 2014 - Chuanqilong) and power trend curve (R² = 0.7764) on ankylosaurs known from body mass	Benson, R. B. J., Campione, N. E., Carrano, M. T., Mannion, P. D., Sullivan, C., Upchurch, P. and Evans, D. C. 2014. Rates of dinosaur body mass evolution indicate 170 Million years of sustained ecological innovation on the avian stem lineage. PLOS Biology 12 (5): e1001853.; Han, F., Zheng, W., Hu, D., Xu, X. and Barrett, P. M. 2014. A new basal ankylosaurid (Dinosauria: Ornithischia) from the Lo…	0.7		Liaoningosaurus	-0.49485	-0.154902
	Dyoplosaurus	ROM 784	Arbour et al., 2014	Arbour, V. M., Burns, M. E., Bell, P. R. and Currie, P. J. 2014. Epidermal and dermal integumentary structures of ankylosaurian dinosaurs. Journal of Morphology 275 (1): 39–50.	1882	ROM 784	Data from Benson et al. (2014) using FL (562 mm; Han et al., 2014 - Chuanqilong) and power trend curve (R² = 0.7764) on ankylosaurs known from body mass	Benson, R. B. J., Campione, N. E., Carrano, M. T., Mannion, P. D., Sullivan, C., Upchurch, P. and Evans, D. C. 2014. Rates of dinosaur body mass evolution indicate 170 Million years of sustained ecological innovation on the avian stem lineage. PLOS Biology 12 (5): e1001853.; Han, F., Zheng, W., Hu, D., Xu, X. and Barrett, P. M. 2014. A new basal ankylosaurid (Dinosauria: Ornithischia) from the Lo…	18		Dyoplosaurus	3.27462	1.25527	740 kg based on Fossilworks, 1200 kg from Paul (2016) and 2195 kg from Holtz (https://www.geol.umd.edu/~tholtz/G104/lectures/104size.html)
	Euoplocephalus	ROM 1930	Arbour et al., 2014	Arbour, V. M., Burns, M. E., Bell, P. R. and Currie, P. J. 2014. Epidermal and dermal integumentary structures of ankylosaurian dinosaurs. Journal of Morphology 275 (1): 39–50.	2329.63	AMNH 5404	Data from Benson et al. (2014)	Benson, R. B. J., Campione, N. E., Carrano, M. T., Mannion, P. D., Sullivan, C., Upchurch, P. and Evans, D. C. 2014. Rates of dinosaur body mass evolution indicate 170 Million years of sustained ecological innovation on the avian stem lineage. PLOS Biology 12 (5): e1001853.	50		Euoplocephalus	3.36729	1.69897
	Scolosaurus	NHMUK R5161	Penkalski & Blows, 2013; Arbour et al., 2014	PenkalskiPaul and T, B. 2013. Scolosaurus cutleri (Ornithischia: Ankylosauria) from the Upper Cretaceous Dinosaur Park Formation of Alberta, Canada. Canadian Journal of Earth Sciences.; Arbour, V. M., Burns, M. E., Bell, P. R. and Currie, P. J. 2014. Epidermal and dermal integumentary structures of ankylosaurian dinosaurs. Journal of Morphology 275 (1): 39–50.	2131	NHMUK R5161	Data from Campione et al. (2020)	Campione, N. E., Evans, D. C., Brown, C. M. and Carrano, M. T. 2014. Body mass estimation in non-avian bipeds using a theoretical conversion to quadruped stylopodial proportions. Methods in Ecology and Evolution 5 (9): 913–923.	80		Scolosaurus	3.32858	1.90309	2259 kg based on data from Benson et al. (2014) using FL (600 mm; Han et al., 2014 - Chuanqilong) and power trend curve (R² = 0.7764) on ankylosaurs known from body mass
	Borealopelta	TMP 2011.033.0001	Brown, 2017; Brown et al., 2017	Brown, C. M. 2017. An exceptionally preserved armored dinosaur reveals the morphology and allometry of osteoderms and their horny epidermal coverings. PeerJ 5: e4066.; Brown, C. M., Henderson, D. M., Vinther, J., Fletcher, I., Sistiaga, A., Herrera, J. and Summons, R. E. 2017. An exceptionally preserved three-dimensional armored dinosaur reveals insights into coloration and Cretaceous predator-pr…	1300	TMP 2011.033.0001	Data from Brown et al. (2017)	Brown, C. M., Henderson, D. M., Vinther, J., Fletcher, I., Sistiaga, A., Herrera, J. and Summons, R. E. 2017. An exceptionally preserved three-dimensional armored dinosaur reveals insights into coloration and Cretaceous predator-prey dynamics. Current Biology 27 (16): 2514-2521.e3.	80		Borealopelta	3.11394	1.90309
Ornithopoda	Mantellisaurus atherfieldensis	NHMUK R5764	Hooley, 1917	Hooley, R. W. 1917. II.—On the Integument of Iguanodon bernissartensis, Boulenger, and of Morosaurus becklesii, Mantell. Geological Magazine 4 (4): 148–150.	1429.13	IRSNB R57	Data from Benson et al. (2014)	Benson, R. B. J., Campione, N. E., Carrano, M. T., Mannion, P. D., Sullivan, C., Upchurch, P. and Evans, D. C. 2014. Rates of dinosaur body mass evolution indicate 170 Million years of sustained ecological innovation on the avian stem lineage. PLOS Biology 12 (5): e1001853.	22		Mantellisaurus	3.15507	1.34242
	Brachylophosaurus canadensis	JRF 115	Bell, 2012, 2014	Bell, P. R. 2012. Standardized terminology and potential taxonomic utility for hadrosaurid skin impressions: a case study for Saurolophus from Canada and Mongolia. PLoS ONE 7 (2): e31295.; Bell, P. R. 2014. A review of hadrosaurid skin impressions. In: Eberth, D. A. and Evans, D. C. (eds.), Hadrosaurs., 572–590. Indiana University Press, Bloomington, Indiana.	4458.36	MOR 794	Data from Benson et al. (2014)	Benson, R. B. J., Campione, N. E., Carrano, M. T., Mannion, P. D., Sullivan, C., Upchurch, P. and Evans, D. C. 2014. Rates of dinosaur body mass evolution indicate 170 Million years of sustained ecological innovation on the avian stem lineage. PLOS Biology 12 (5): e1001853.	10		Brachylophosaurus	3.64918	1
	Edmontosaurus annectens	AMNH 5060	Bell, 2012, 2014	Bell, P. R. 2012. Standardized terminology and potential taxonomic utility for hadrosaurid skin impressions: a case study for Saurolophus from Canada and Mongolia. PLoS ONE 7 (2): e31295.; Bell, P. R. 2014. A review of hadrosaurid skin impressions. In: Eberth, D. A. and Evans, D. C. (eds.), Hadrosaurs., 572–590. Indiana University Press, Bloomington, Indiana.	6610.08	AMNH 5730	Data from Benson et al. (2014)	Benson, R. B. J., Campione, N. E., Carrano, M. T., Mannion, P. D., Sullivan, C., Upchurch, P. and Evans, D. C. 2014. Rates of dinosaur body mass evolution indicate 170 Million years of sustained ecological innovation on the avian stem lineage. PLOS Biology 12 (5): e1001853.	10		Edmontosaurus annectens	3.82021	1
	Edmontosaurus regalis	ROM 801	Bell, 2012, 2014	Bell, P. R. 2012. Standardized terminology and potential taxonomic utility for hadrosaurid skin impressions: a case study for Saurolophus from Canada and Mongolia. PLoS ONE 7 (2): e31295.; Bell, P. R. 2014. A review of hadrosaurid skin impressions. In: Eberth, D. A. and Evans, D. C. (eds.), Hadrosaurs., 572–590. Indiana University Press, Bloomington, Indiana.	7586.5	CMN 2289	Data from Benson et al. (2014); ROM 801 has similarly sized limbs as CMN 2289	Benson, R. B. J., Campione, N. E., Carrano, M. T., Mannion, P. D., Sullivan, C., Upchurch, P. and Evans, D. C. 2014. Rates of dinosaur body mass evolution indicate 170 Million years of sustained ecological innovation on the avian stem lineage. PLOS Biology 12 (5): e1001853.	9		Edmontosaurus regalis	3.88004	0.954243
	Gryposaurus notabilis	CMN 2278	Bell, 2012, 2014; Bertozzo et al., 2017	Bell, P. R. 2012. Standardized terminology and potential taxonomic utility for hadrosaurid skin impressions: a case study for Saurolophus from Canada and Mongolia. PLoS ONE 7 (2): e31295.; Bell, P. R. 2014. A review of hadrosaurid skin impressions. In: Eberth, D. A. and Evans, D. C. (eds.), Hadrosaurs., 572–590. Indiana University Press, Bloomington, Indiana.; Bertozzo, F., Sasso, C. D., Fabbri, …	4311.58	AMNH 5350	Data from Benson et al. (2014)	Benson, R. B. J., Campione, N. E., Carrano, M. T., Mannion, P. D., Sullivan, C., Upchurch, P. and Evans, D. C. 2014. Rates of dinosaur body mass evolution indicate 170 Million years of sustained ecological innovation on the avian stem lineage. PLOS Biology 12 (5): e1001853.	5		Gryposaurus	3.63464	0.69897
	Maiasaura peeblesorum	ROM 44770	Bell, 2012, 2014	Bell, P. R. 2012. Standardized terminology and potential taxonomic utility for hadrosaurid skin impressions: a case study for Saurolophus from Canada and Mongolia. PLoS ONE 7 (2): e31295.; Bell, P. R. 2014. A review of hadrosaurid skin impressions. In: Eberth, D. A. and Evans, D. C. (eds.), Hadrosaurs., 572–590. Indiana University Press, Bloomington, Indiana.	3656.37	ROM 44770	Data from Benson et al. (2014)	Benson, R. B. J., Campione, N. E., Carrano, M. T., Mannion, P. D., Sullivan, C., Upchurch, P. and Evans, D. C. 2014. Rates of dinosaur body mass evolution indicate 170 Million years of sustained ecological innovation on the avian stem lineage. PLOS Biology 12 (5): e1001853.	10		Maiasaura	3.56305	1
	Saurolophus osborni	AMNH 5220	Bell, 2012, 2014	Bell, P. R. 2012. Standardized terminology and potential taxonomic utility for hadrosaurid skin impressions: a case study for Saurolophus from Canada and Mongolia. PLoS ONE 7 (2): e31295.; Bell, P. R. 2014. A review of hadrosaurid skin impressions. In: Eberth, D. A. and Evans, D. C. (eds.), Hadrosaurs., 572–590. Indiana University Press, Bloomington, Indiana.	6638.71	AMNH 5220	Data from Benson et al. (2014)	Benson, R. B. J., Campione, N. E., Carrano, M. T., Mannion, P. D., Sullivan, C., Upchurch, P. and Evans, D. C. 2014. Rates of dinosaur body mass evolution indicate 170 Million years of sustained ecological innovation on the avian stem lineage. PLOS Biology 12 (5): e1001853.	11		Saurolophus	3.82208	1.04139
	Corythosaurus casuarius	CMN 8676	Bell, 2012, 2014	Bell, P. R. 2012. Standardized terminology and potential taxonomic utility for hadrosaurid skin impressions: a case study for Saurolophus from Canada and Mongolia. PLoS ONE 7 (2): e31295.; Bell, P. R. 2014. A review of hadrosaurid skin impressions. In: Eberth, D. A. and Evans, D. C. (eds.), Hadrosaurs., 572–590. Indiana University Press, Bloomington, Indiana.	3455.66	ROM 845	Data from Benson et al. (2014)	Benson, R. B. J., Campione, N. E., Carrano, M. T., Mannion, P. D., Sullivan, C., Upchurch, P. and Evans, D. C. 2014. Rates of dinosaur body mass evolution indicate 170 Million years of sustained ecological innovation on the avian stem lineage. PLOS Biology 12 (5): e1001853.	18		Corythosaurus	3.53853	1.25527
	Lambeosaurus lambei	ROM 1218	Bell, 2012, 2014	Bell, P. R. 2012. Standardized terminology and potential taxonomic utility for hadrosaurid skin impressions: a case study for Saurolophus from Canada and Mongolia. PLoS ONE 7 (2): e31295.; Bell, P. R. 2014. A review of hadrosaurid skin impressions. In: Eberth, D. A. and Evans, D. C. (eds.), Hadrosaurs., 572–590. Indiana University Press, Bloomington, Indiana.	3300.26	ROM 1218	Data from Benson et al. (2014)	Benson, R. B. J., Campione, N. E., Carrano, M. T., Mannion, P. D., Sullivan, C., Upchurch, P. and Evans, D. C. 2014. Rates of dinosaur body mass evolution indicate 170 Million years of sustained ecological innovation on the avian stem lineage. PLOS Biology 12 (5): e1001853.	9		Lambeosaurus lambei	3.51855	0.954243
	Lambeosaurus magnicristatus	TMP 1966.004.0001	Bell, 2012, 2014	Bell, P. R. 2012. Standardized terminology and potential taxonomic utility for hadrosaurid skin impressions: a case study for Saurolophus from Canada and Mongolia. PLoS ONE 7 (2): e31295.; Bell, P. R. 2014. A review of hadrosaurid skin impressions. In: Eberth, D. A. and Evans, D. C. (eds.), Hadrosaurs., 572–590. Indiana University Press, Bloomington, Indiana.	3300.26	ROM 1218	Data from Benson et al. (2014); very close femur dimension betweem TMP 1966.004.0001 and ROM 1218	Benson, R. B. J., Campione, N. E., Carrano, M. T., Mannion, P. D., Sullivan, C., Upchurch, P. and Evans, D. C. 2014. Rates of dinosaur body mass evolution indicate 170 Million years of sustained ecological innovation on the avian stem lineage. PLOS Biology 12 (5): e1001853.	5		Lambeosaurus magnicristatus	3.51855	0.69897
	Concavenator	MCCM-LH 6666	Hendrickx, personal measurements from photos using ImageJ	/	669.213	MCCM-LH 6666	Data from Benson et al. (2014)	Benson, R. B. J., Campione, N. E., Carrano, M. T., Mannion, P. D., Sullivan, C., Upchurch, P. and Evans, D. C. 2014. Rates of dinosaur body mass evolution indicate 170 Million years of sustained ecological innovation on the avian stem lineage. PLOS Biology 12 (5): e1001853.	17	5	Concavenator	2.82556		Excluded because scutate ventral scales from the tail and scales from podotheca, no basement scales known in this taxon
